# Supplementary material
Source: PubMed Central journal article supplement (PMC4231441)
Supplement: NIHMS574370-supplement-Web_Appendix.pdf [file NIHMS574370-supplement-Web_Appendix.pdf]

Web Appendix to:  
Can Marginal Rates of Substitution Be Inferred  
From Happiness Data?  
Evidence from Residency Choices

Daniel J. Benjamin  
*Cornell University and NBER*

Ori Heffetz  
*Cornell University and NBER*

Miles S. Kimball  
*University of Michigan and NBER*

Alex Rees-Jones  
*Cornell University and NBER*

**This Draft:** November 7, 2013

---

Table A1: Summary Statistics

| <i>Main survey (561 respondents)</i>   |        |     |     |     |     |
|----------------------------------------|--------|-----|-----|-----|-----|
|                                        | Median | p10 | p25 | p75 | p90 |
| Age                                    | 26     | 25  | 25  | 28  | 30  |
| College GPA                            | 3.8    | 3.4 | 3.6 | 3.9 | 4.0 |
| MCAT score                             | 32     | 26  | 29  | 34  | 37  |
| MLE Step 1 Score                       | 228    | 198 | 214 | 244 | 255 |
| MLE Step 2 Score                       | 241    | 211 | 226 | 255 | 265 |
| Survey completion time                 | 18     | 10  | 14  | 23  | 38  |
|                                        | %      |     |     |     |     |
| Female                                 | 47%    |     |     |     |     |
| Participated in dual match             | 7%     |     |     |     |     |
| <i>Relationship status:</i>            |        |     |     |     |     |
| Single                                 | 35%    |     |     |     |     |
| In a long-term relationship            | 35%    |     |     |     |     |
| Married                                | 30%    |     |     |     |     |
| <i>Repeat survey (131 respondents)</i> |        |     |     |     |     |
|                                        | Median | p10 | p25 | p75 | p90 |
| Age                                    | 26     | 25  | 26  | 28  | 31  |
| College GPA                            | 3.8    | 3.3 | 3.5 | 3.9 | 4.0 |
| MCAT score                             | 32     | 27  | 29  | 34  | 38  |
| MLE Step 1 Score                       | 228    | 201 | 216 | 244 | 253 |
| MLE Step 2 Score                       | 242    | 211 | 227 | 255 | 265 |
| Survey completion time                 | 18     | 10  | 13  | 24  | 50  |
|                                        | %      |     |     |     |     |
| Female                                 | 40%    |     |     |     |     |
| Participated in dual match             | 6%     |     |     |     |     |
| <i>Relationship status:</i>            |        |     |     |     |     |
| Single                                 | 34%    |     |     |     |     |
| In a long-term relationship            | 31%    |     |     |     |     |
| Married                                | 35%    |     |     |     |     |

**Notes:** Distributional information on respondent characteristics. For continuous variables, the median, 10<sup>th</sup>, 25<sup>th</sup>, 75<sup>th</sup>, and 90<sup>th</sup> percentiles are reported. Survey completion time is reported in minutes.

Table A2: Means and Standard Deviations of SWB and Attribute Ratings

|                                     | Preference Rank |            |            |            |            |
|-------------------------------------|-----------------|------------|------------|------------|------------|
|                                     | 1               | 2          | 3          | 4          | All        |
| Happiness during residency          | 82<br>(14)      | 78<br>(14) | 76<br>(14) | 73<br>(17) | 78<br>(15) |
| Life satisfaction during residency  | 87<br>(13)      | 82<br>(14) | 78<br>(14) | 75<br>(16) | 81<br>(15) |
| Ladder                              | 88<br>(13)      | 82<br>(13) | 77<br>(15) | 73<br>(17) | 80<br>(16) |
| Residency prestige and status       | 83<br>(19)      | 79<br>(19) | 75<br>(20) | 71<br>(21) | 77<br>(20) |
| Social life during residency        | 75<br>(20)      | 71<br>(20) | 68<br>(20) | 65<br>(21) | 70<br>(21) |
| Desirability of location            | 86<br>(19)      | 78<br>(20) | 72<br>(23) | 67<br>(23) | 76<br>(22) |
| Anxiety during residency            | 55<br>(25)      | 55<br>(24) | 54<br>(24) | 54<br>(24) | 55<br>(24) |
| Worthwhile life during residency    | 89<br>(13)      | 86<br>(14) | 83<br>(16) | 81<br>(17) | 85<br>(15) |
| Stress during residency             | 59<br>(23)      | 58<br>(23) | 57<br>(23) | 57<br>(22) | 58<br>(23) |
| Future career prospects             | 91<br>(13)      | 87<br>(13) | 84<br>(16) | 81<br>(17) | 86<br>(15) |
| Control over life                   | 70<br>(22)      | 68<br>(21) | 66<br>(21) | 66<br>(21) | 67<br>(21) |
| Desirable for significant other     | 87<br>(20)      | 76<br>(25) | 65<br>(28) | 59<br>(27) | 72<br>(27) |
| Average happiness in first 10 years | 86<br>(12)      | 84<br>(12) | 82<br>(13) |            | 84<br>(13) |
| Average happiness in rest of career | 86<br>(11)      | 84<br>(12) | 83<br>(12) |            | 84<br>(12) |
| Average happiness after retirement  | 86<br>(15)      | 85<br>(15) | 85<br>(15) |            | 85<br>(15) |

**Notes:** Means of primary variables, by rank in the NRMP preference ordering. Standard deviations in parentheses. Based on main sample of 561 respondents.

Table A3: Test-Retest Correlations

|                                     | Correlation between wave 1 and wave 2 responses | Within-subject correlation between wave 1 and wave 2 responses |
|-------------------------------------|-------------------------------------------------|----------------------------------------------------------------|
| Happiness during residency          | 0.70                                            | 0.59                                                           |
| Life satisfaction during residency  | 0.67                                            | 0.52                                                           |
| Ladder                              | 0.62                                            | 0.56                                                           |
| Residency prestige and status       | 0.78                                            | 0.71                                                           |
| Social life during residency        | 0.72                                            | 0.59                                                           |
| Desirability of location            | 0.79                                            | 0.81                                                           |
| Anxiety during residency            | 0.58                                            | 0.24                                                           |
| Worthwhile life during residency    | 0.66                                            | 0.40                                                           |
| Stress during residency             | 0.59                                            | 0.37                                                           |
| Future career prospects             | 0.64                                            | 0.52                                                           |
| Control over life                   | 0.60                                            | 0.24                                                           |
| Desirable for significant other     | 0.78                                            | 0.81                                                           |
| Average happiness in first 10 years | 0.45                                            | 0.45                                                           |
| Average happiness in rest of career | 0.42                                            | 0.46                                                           |
| Average happiness after retirement  | 0.58                                            | 0.30                                                           |

**Notes:** Correlation between first-wave and second-wave survey responses for the 131 main-sample respondents who participated in the follow up survey. The second column reports the correlation after variables are demeaned at the respondent level.

Table A4: Differences Between SWB and Choice Coefficients in Table 3, With  $p$ -values

|                                     | (1)<br>Happiness<br>during<br>residency | (2)<br>Life<br>satisfaction<br>during<br>residency | (3)<br>Ladder           | (4)<br>4-period-<br>happiness<br>index | (5)<br>3-SWB-<br>measure<br>index | (6)<br>6-SWB-<br>question<br>index |
|-------------------------------------|-----------------------------------------|----------------------------------------------------|-------------------------|----------------------------------------|-----------------------------------|------------------------------------|
| Residency prestige<br>and status    | 1.3***<br><i>0.000</i>                  | 1.0***<br><i>0.000</i>                             | 0.9***<br><i>0.000</i>  | 1.2***<br><i>0.000</i>                 | 1.0***<br><i>0.000</i>            | 0.9***<br><i>0.001</i>             |
| Social life during<br>residency     | -1.2***<br><i>0.000</i>                 | -0.7***<br><i>0.006</i>                            | -0.8***<br><i>0.001</i> | -0.8***<br><i>0.007</i>                | -0.9***<br><i>0.000</i>           | -0.8***<br><i>0.003</i>            |
| Desirability of<br>location         | 0.6***<br><i>0.001</i>                  | -0.0<br><i>0.831</i>                               | -0.0<br><i>0.932</i>    | 0.6**<br><i>0.011</i>                  | -0.0<br><i>0.926</i>              | 0.2<br><i>0.367</i>                |
| Anxiety during<br>residency         | 0.6**<br><i>0.018</i>                   | 0.1<br><i>0.648</i>                                | 0.3<br><i>0.273</i>     | 1.0***<br><i>0.001</i>                 | 0.3<br><i>0.221</i>               | 0.5*<br><i>0.065</i>               |
| Worthwhile life<br>during residency | -1.5***<br><i>0.000</i>                 | -1.5***<br><i>0.000</i>                            | -0.8**<br><i>0.029</i>  | -1.3***<br><i>0.005</i>                | -0.8**<br><i>0.026</i>            | -0.8**<br><i>0.049</i>             |
| Stress during<br>residency          | 0.6**<br><i>0.036</i>                   | 0.3<br><i>0.203</i>                                | 0.2<br><i>0.348</i>     | -0.4<br><i>0.167</i>                   | 0.3<br><i>0.223</i>               | -0.1<br><i>0.821</i>               |
| Future career<br>prospects          | 1.2***<br><i>0.003</i>                  | 0.7*<br><i>0.059</i>                               | 0.2<br><i>0.515</i>     | 0.9**<br><i>0.040</i>                  | 0.5<br><i>0.168</i>               | 0.5<br><i>0.241</i>                |
| Control over life                   | -0.3<br><i>0.209</i>                    | -0.0<br><i>0.899</i>                               | 0.0<br><i>0.876</i>     | -0.4<br><i>0.194</i>                   | 0.0<br><i>0.994</i>               | -0.5*<br><i>0.051</i>              |
| Desirable for<br>significant other  | 1.1***<br><i>0.000</i>                  | 1.0***<br><i>0.000</i>                             | 0.9***<br><i>0.000</i>  | 1.2***<br><i>0.000</i>                 | 0.8***<br><i>0.000</i>            | 0.9***<br><i>0.000</i>             |

**Notes:** Each column reports the difference between the coefficient estimated with choice data and the corresponding coefficient estimated with each column's SWB metric. For example, the coefficient of 1.1 reported for "Desirable for significant other" (bottom row) in the first column equals the difference between table 3's choice coefficient of 1.4 and the happiness-during-residency coefficient of 0.3.  $p$ -values are reported in *italics*, based on delta-method standard errors. \*  $p < .1$ , \*\*  $p < .05$ , \*\*\*  $p < .01$

Table A5: Table 3's Rank-Ordered Logit Estimates vs. OLS Estimates

|                                        | (1)<br>Choice   | (2)<br>Happiness during<br>residency | (3)<br>OLS      | (4)<br>Life satisfaction during<br>residency | (5)<br>OLS      | (6)<br>Ladder   | (7)<br>OLS      |
|----------------------------------------|-----------------|--------------------------------------|-----------------|----------------------------------------------|-----------------|-----------------|-----------------|
| Estimation<br>Method                   | RO              | RO                                   | OLS             | RO                                           | OLS             | RO              | OLS             |
| Residency<br>prestige and<br>status    | 1.4***<br>(0.2) | 0.0<br>(0.2)                         | 0.0<br>(0.3)    | 0.4*<br>(0.2)                                | 0.5*<br>(0.3)   | 0.4**<br>(0.2)  | 0.8***<br>(0.2) |
| Social life<br>during<br>residency     | 0.8***<br>(0.2) | 2.0***<br>(0.2)                      | 1.9***<br>(0.3) | 1.5***<br>(0.2)                              | 1.6***<br>(0.3) | 1.6***<br>(0.2) | 1.5***<br>(0.2) |
| Desirability of<br>location            | 0.9***<br>(0.1) | 0.3*<br>(0.2)                        | 0.2<br>(0.2)    | 1.0***<br>(0.1)                              | 0.9***<br>(0.2) | 0.9***<br>(0.1) | 1.0***<br>(0.2) |
| Anxiety during<br>residency            | -0.1<br>(0.2)   | -0.8***<br>(0.2)                     | -0.7**<br>(0.3) | -0.3<br>(0.2)                                | -0.5**<br>(0.2) | -0.4**<br>(0.2) | -0.5**<br>(0.2) |
| Worthwhile<br>life during<br>residency | 2.4***<br>(0.2) | 3.9***<br>(0.3)                      | 4.3***<br>(0.5) | 3.9***<br>(0.3)                              | 3.8***<br>(0.4) | 3.2***<br>(0.3) | 2.9***<br>(0.4) |
| Stress during<br>residency             | -0.1<br>(0.2)   | -0.6***<br>(0.2)                     | -0.6**<br>(0.3) | -0.4**<br>(0.2)                              | -0.2<br>(0.3)   | -0.3*<br>(0.2)  | -0.5**<br>(0.2) |
| Future career<br>prospects             | 1.7***<br>(0.3) | 0.5*<br>(0.3)                        | 0.4<br>(0.4)    | 1.0***<br>(0.3)                              | 0.7*<br>(0.4)   | 1.5***<br>(0.3) | 1.2***<br>(0.3) |
| Control over<br>life                   | 0.2<br>(0.2)    | 0.5***<br>(0.2)                      | 0.7**<br>(0.3)  | 0.2<br>(0.2)                                 | 0.4*<br>(0.3)   | 0.2<br>(0.2)    | 0.2<br>(0.2)    |
| Desirable for<br>significant<br>other  | 1.4***<br>(0.1) | 0.3*<br>(0.2)                        | 0.2<br>(0.2)    | 0.4***<br>(0.1)                              | 0.5***<br>(0.2) | 0.5***<br>(0.1) | 0.6***<br>(0.2) |
| # Observations                         | 2169            | 2167                                 |                 | 2169                                         |                 | 2168            |                 |
| # Students                             | 557             | 557                                  |                 | 557                                          |                 | 557             |                 |

**Notes:** Table constructed analogously to table 3. Delta-method standard errors in parentheses. The “Estimation Method” header indicates if the initial coefficient estimates were generated with rank-ordered logit (RO) or OLS with respondent fixed effects and standard errors clustered at the respondent level (OLS). Columns marked RO are identical to those in table 3, and are repeated only for ease of side-by-side comparison to the OLS estimates. \*  $p < .1$ , \*\*  $p < .05$ , \*\*\*  $p < .01$

Table A6: Table 3's Rank-Ordered Logit Estimates vs. Ordered Logit Estimates

|                                        | (1)<br>Choice   | (2)<br>Happiness during<br>residency | (3)<br>O        | (4)<br>Life satisfaction during<br>residency | (5)<br>O         | (6)<br>Ladder   | (7)<br>O         |
|----------------------------------------|-----------------|--------------------------------------|-----------------|----------------------------------------------|------------------|-----------------|------------------|
| Estimation<br>Method                   | RO              | RO                                   | O               | RO                                           | O                | RO              | O                |
| Residency<br>prestige and<br>status    | 1.4***<br>(0.2) | 0.0<br>(0.2)                         | -0.3<br>(0.2)   | 0.4*<br>(0.2)                                | 0.2<br>(0.2)     | 0.4**<br>(0.2)  | 0.7***<br>(0.2)  |
| Social life<br>during<br>residency     | 0.8***<br>(0.2) | 2.0***<br>(0.2)                      | 1.9***<br>(0.2) | 1.5***<br>(0.2)                              | 1.3***<br>(0.2)  | 1.6***<br>(0.2) | 1.2***<br>(0.2)  |
| Desirability of<br>location            | 0.9***<br>(0.1) | 0.3*<br>(0.2)                        | 0.4***<br>(0.1) | 1.0***<br>(0.1)                              | 1.0***<br>(0.1)  | 0.9***<br>(0.1) | 1.5***<br>(0.1)  |
| Anxiety during<br>residency            | -0.1<br>(0.2)   | -0.8***<br>(0.2)                     | -0.1<br>(0.2)   | -0.3<br>(0.2)                                | -0.0<br>(0.1)    | -0.4**<br>(0.2) | -0.0<br>(0.1)    |
| Worthwhile<br>life during<br>residency | 2.4***<br>(0.2) | 3.9***<br>(0.3)                      | 4.5***<br>(0.3) | 3.9***<br>(0.3)                              | 4.7***<br>(0.3)  | 3.2***<br>(0.3) | 3.5***<br>(0.3)  |
| Stress during<br>residency             | -0.1<br>(0.2)   | -0.6***<br>(0.2)                     | -0.3<br>(0.2)   | -0.4**<br>(0.2)                              | -0.4***<br>(0.1) | -0.3*<br>(0.2)  | -0.4***<br>(0.2) |
| Future career<br>prospects             | 1.7***<br>(0.3) | 0.5*<br>(0.3)                        | 1.1***<br>(0.2) | 1.0***<br>(0.3)                              | 0.9***<br>(0.3)  | 1.5***<br>(0.3) | 1.3***<br>(0.2)  |
| Control over<br>life                   | 0.2<br>(0.2)    | 0.5***<br>(0.2)                      | 0.4***<br>(0.1) | 0.2<br>(0.2)                                 | 0.4***<br>(0.1)  | 0.2<br>(0.2)    | 0.1<br>(0.1)     |
| Desirable for<br>significant<br>other  | 1.4***<br>(0.1) | 0.3*<br>(0.2)                        | 0.1<br>(0.1)    | 0.4***<br>(0.1)                              | 0.1**<br>(0.1)   | 0.5***<br>(0.1) | 0.3***<br>(0.1)  |
| # Observations                         | 2169            | 2167                                 |                 | 2169                                         |                  | 2168            |                  |
| # Students                             | 557             | 557                                  |                 | 557                                          |                  | 557             |                  |

**Notes:** Table constructed analogously to table 3. Delta-method standard errors in parentheses. The “Estimation Method” header indicates if the initial coefficient estimates were generated with rank-ordered logit (RO) or ordered logit with standard errors clustered at the respondent level (O). Columns marked RO are identical to those in table 3, and are repeated only for ease of side-by-side comparison to the ordered logit estimates. \*  $p < .1$ , \*\*  $p < .05$ , \*\*\*  $p < .01$

Table A7: Table 3 with Residency Attributes Normalized Within Respondent

|                                                                     | (1)<br>Choice   | (2)<br>Happiness<br>During<br>Residency | (3)<br>Life<br>Satisfaction<br>During<br>Residency | (4)<br>Ladder   | (5)<br>4-Period-<br>Happiness<br>index | (6)<br>3-SWB-<br>measure<br>index | (7)<br>6-SWB-<br>question<br>index |
|---------------------------------------------------------------------|-----------------|-----------------------------------------|----------------------------------------------------|-----------------|----------------------------------------|-----------------------------------|------------------------------------|
| Residency Prestige<br>and Status                                    | 1.2***<br>(0.2) | -0.1<br>(0.3)                           | 0.3<br>(0.2)                                       | 0.5**<br>(0.2)  | 0.3<br>(0.3)                           | 0.4**<br>(0.2)                    | 0.5**<br>(0.2)                     |
| Social Life During<br>Residency                                     | 0.9***<br>(0.1) | 2.2***<br>(0.3)                         | 1.9***<br>(0.2)                                    | 1.7***<br>(0.2) | 2.0***<br>(0.3)                        | 1.9***<br>(0.2)                   | 1.8***<br>(0.2)                    |
| Desirability of<br>Location                                         | 1.3***<br>(0.2) | 0.5**<br>(0.2)                          | 1.5***<br>(0.2)                                    | 1.6***<br>(0.2) | 0.5<br>(0.3)                           | 1.5***<br>(0.2)                   | 1.1***<br>(0.2)                    |
| Anxiety During<br>Residency                                         | -0.0<br>(0.2)   | -0.9***<br>(0.2)                        | -0.2<br>(0.2)                                      | -0.4**<br>(0.2) | -1.3***<br>(0.2)                       | -0.5***<br>(0.2)                  | -0.7***<br>(0.2)                   |
| Worthwhile Life<br>During Residency                                 | 1.7***<br>(0.2) | 2.6***<br>(0.3)                         | 2.7***<br>(0.2)                                    | 2.0***<br>(0.2) | 2.4***<br>(0.3)                        | 2.1***<br>(0.2)                   | 2.0***<br>(0.2)                    |
| Stress During<br>Residency                                          | 0.1<br>(0.2)    | -0.7***<br>(0.2)                        | -0.2<br>(0.2)                                      | -0.2<br>(0.2)   | 0.3<br>(0.3)                           | -0.3<br>(0.2)                     | 0.1<br>(0.2)                       |
| Future Career<br>Prospects                                          | 1.4***<br>(0.2) | 0.5*<br>(0.3)                           | 1.1***<br>(0.3)                                    | 1.4***<br>(0.2) | 0.9***<br>(0.3)                        | 1.2***<br>(0.2)                   | 1.1***<br>(0.3)                    |
| Control Over Life                                                   | 0.2<br>(0.1)    | 0.6***<br>(0.2)                         | 0.2<br>(0.2)                                       | 0.2<br>(0.2)    | 0.7***<br>(0.2)                        | 0.2<br>(0.2)                      | 0.6***<br>(0.2)                    |
| Desirable for<br>Significant Other                                  | 2.3***<br>(0.2) | 0.9***<br>(0.3)                         | 0.8***<br>(0.3)                                    | 1.0***<br>(0.2) | 0.8**<br>(0.3)                         | 1.1***<br>(0.2)                   | 1.0***<br>(0.3)                    |
| # Observations                                                      | 2169            | 2167                                    | 2169                                               | 2168            | 1591                                   | 2166                              | 1590                               |
| # Students                                                          | 557             | 557                                     | 557                                                | 557             | 540                                    | 557                               | 540                                |
| Joint significance<br>of differences<br>with choice<br>coefficients |                 | 0.000                                   | 0.000                                              | 0.000           | 0.000                                  | 0.000                             | 0.000                              |

**Notes:** Table constructed analogously to table 3, with the nine residency attributes normalized within-subject. Delta-method standard errors in parentheses. To generate the normalized variables, the mean and standard deviation of each attribute is calculated across the different programs the respondent rated. The variable included is (attribute rating – respondent-specific mean)/(respondent-specific standard deviation). If the standard deviation is zero or undefined, the variable is set to zero. \*  $p < .1$ , \*\*  $p < .05$ , \*\*\*  $p < .01$



Table A8: Weight Estimates for 12- and 15-Question Indices

|                                                 | (1)<br>Choice   | (2)<br>Choice   |
|-------------------------------------------------|-----------------|-----------------|
| Happiness during residency                      | 1.9***<br>(0.5) | 1.5**<br>(0.7)  |
| Life satisfaction during residency              | 3.3***<br>(0.5) | 3.3***<br>(0.7) |
| Ladder                                          | 3.2***<br>(0.5) | 3.8***<br>(0.7) |
| Residency prestige and status                   | 2.5***<br>(0.3) | 2.4***<br>(0.5) |
| Social life during residency                    | 0.4<br>(0.3)    | 0.1<br>(0.5)    |
| Desirability of location                        | 1.1***<br>(0.2) | 0.7**<br>(0.3)  |
| Anxiety during residency                        | 0.2<br>(0.3)    | -0.1<br>(0.4)   |
| Worthwhile life during residency                | 1.9***<br>(0.6) | 1.8**<br>(0.8)  |
| Stress during residency                         | 0.3<br>(0.3)    | 1.0**<br>(0.5)  |
| Future career prospects                         | 2.8***<br>(0.5) | 2.1***<br>(0.7) |
| Control over life                               | 0.1<br>(0.3)    | -0.0<br>(0.4)   |
| Desirable for significant other                 | 2.5***<br>(0.3) | 3.2***<br>(0.4) |
| Happiness in first 10 years                     |                 | 3.7***<br>(1.0) |
| Happiness in rest of career                     |                 | 2.1**<br>(1.0)  |
| Happiness after retirement                      |                 | 1.4<br>(1.0)    |
| # Observations                                  | 2166            | 1590            |
| # Students                                      | 557             | 540             |
| McKelvey & Zavoina $R^2$ , within variance only | 0.57            | 0.54            |

**Notes:** Standard errors in parentheses. Rank-ordered logit regressions of choice on SWB measures and attribute ratings. All attribute ratings are divided by 100 prior to inclusion in the regression. \*  $p < .1$ , \*\*  $p < .05$ , \*\*\*  $p < .01$

Table A9: Within-Subject Correlation Matrix of SWB Measures and Attribute Ratings

|                                    | Happiness during residency | Life satisfaction during residency | Ladder | Residency prestige and status | Social life during residency | Desirability of location | Anxiety during residency | Worthwhile life during residency | Stress during residency | Future career prospects | Control over life | Desirable for significant other |
|------------------------------------|----------------------------|------------------------------------|--------|-------------------------------|------------------------------|--------------------------|--------------------------|----------------------------------|-------------------------|-------------------------|-------------------|---------------------------------|
| Happiness during residency         | 1.00                       | 0.58                               | 0.51   | 0.03                          | 0.42                         | 0.27                     | -0.14                    | 0.50                             | -0.14                   | 0.12                    | 0.10              | 0.23                            |
| Life satisfaction during residency | 0.58                       | 1.00                               | 0.60   | 0.14                          | 0.44                         | 0.42                     | -0.07                    | 0.52                             | -0.05                   | 0.21                    | 0.11              | 0.33                            |
| Ladder                             | 0.51                       | 0.60                               | 1.00   | 0.21                          | 0.44                         | 0.45                     | -0.07                    | 0.51                             | -0.06                   | 0.28                    | 0.09              | 0.37                            |
| Residency prestige and status      | 0.03                       | 0.14                               | 0.21   | 1.00                          | -0.05                        | -0.01                    | 0.21                     | 0.11                             | 0.26                    | 0.65                    | 0.18              | 0.02                            |
| Social life during residency       | 0.42                       | 0.44                               | 0.44   | -0.05                         | 1.00                         | 0.43                     | -0.07                    | 0.35                             | -0.09                   | -0.02                   | 0.02              | 0.28                            |
| Desirability of location           | 0.27                       | 0.42                               | 0.45   | -0.01                         | 0.43                         | 1.00                     | 0.03                     | 0.29                             | 0.04                    | 0.07                    | 0.06              | 0.52                            |
| Anxiety during residency           | -0.14                      | -0.07                              | -0.07  | 0.21                          | -0.07                        | 0.03                     | 1.00                     | -0.07                            | 0.51                    | 0.18                    | 0.22              | 0.02                            |
| Worthwhile life during residency   | 0.50                       | 0.52                               | 0.51   | 0.11                          | 0.35                         | 0.29                     | -0.07                    | 1.00                             | -0.07                   | 0.24                    | 0.08              | 0.26                            |
| Stress during residency            | -0.14                      | -0.05                              | -0.06  | 0.26                          | -0.09                        | 0.04                     | 0.51                     | -0.07                            | 1.00                    | 0.19                    | 0.22              | 0.03                            |
| Future career prospects            | 0.12                       | 0.21                               | 0.28   | 0.65                          | -0.02                        | 0.07                     | 0.18                     | 0.24                             | 0.19                    | 1.00                    | 0.20              | 0.06                            |
| Control over life                  | 0.10                       | 0.11                               | 0.09   | 0.18                          | 0.02                         | 0.06                     | 0.22                     | 0.08                             | 0.22                    | 0.20                    | 1.00              | 0.06                            |
| Desirable for significant other    | 0.23                       | 0.33                               | 0.37   | 0.02                          | 0.28                         | 0.52                     | 0.02                     | 0.26                             | 0.03                    | 0.06                    | 0.06              | 1.00                            |

Table A10: Table 4 Restricted to 4-Period-Happiness Index Estimation Sample

|                                                 | (1)<br>Choice   | (2)<br>Choice   | (3)<br>Choice   |
|-------------------------------------------------|-----------------|-----------------|-----------------|
| Happiness during residency                      | 4.6***<br>(0.5) | 1.0*<br>(0.6)   | 0.9<br>(0.6)    |
| Happiness in first 10 years                     | 4.6***<br>(0.8) |                 | 3.5***<br>(0.9) |
| Happiness in rest of career                     | 2.6***<br>(0.9) |                 | 2.4***<br>(0.9) |
| Happiness after retirement                      | 1.4*<br>(0.9)   |                 | 2.0**<br>(0.9)  |
| Life satisfaction during residency              |                 | 4.1***<br>(0.7) | 3.9***<br>(0.7) |
| Ladder                                          |                 | 5.8***<br>(0.6) | 5.4***<br>(0.6) |
| # Observations                                  | 1607            | 1607            | 1607            |
| # Students                                      | 544             | 544             | 544             |
| McKelvey & Zavoina $R^2$ , within variance only | 0.18            | 0.32            | 0.37            |

**Notes:** This table replicates table 4, with the sample restricted to the observations available in column 3 of table 4. \*  $p < .1$ , \*\*  $p < .05$ , \*\*\*  $p < .01$

Table A11: Forecasting Choice and SWB with City Characteristics and U.S. News Data

|                                                    | (1)<br>Choice     | (2)<br>Happiness<br>during residency | (3)<br>Life satisfaction<br>during residency | (4)<br>Ladder     |
|----------------------------------------------------|-------------------|--------------------------------------|----------------------------------------------|-------------------|
| Air quality index                                  | -0.002<br>(0.003) | 0.000<br>(0.003)                     | -0.002<br>(0.003)                            | 0.002<br>(0.003)  |
| Crime rate                                         | 0.001<br>(0.003)  | -0.007*<br>(0.003)                   | 0.002<br>(0.003)                             | 0.000<br>(0.003)  |
| Median commute                                     | 0.008<br>(0.011)  | -0.020<br>(0.014)                    | -0.029**<br>(0.015)                          | 0.003<br>(0.012)  |
| Number of clear days                               | -0.006<br>(0.006) | -0.011<br>(0.007)                    | -0.006<br>(0.007)                            | -0.002<br>(0.007) |
| Ln(population)                                     | -0.011<br>(0.053) | 0.002<br>(0.063)                     | 0.100<br>(0.063)                             | 0.028<br>(0.057)  |
| Ln(family purchasing power)                        | 0.302<br>(0.211)  | 0.241<br>(0.244)                     | 0.493**<br>(0.241)                           | 0.122<br>(0.229)  |
| On U.S. News Honor Roll                            | 0.008<br>(0.109)  | -0.236*<br>(0.127)                   | -0.057<br>(0.121)                            | -0.094<br>(0.119) |
| # Observations                                     | 1657              | 1632                                 | 1632                                         | 1632              |
| # Students                                         | 552               | 550                                  | 550                                          | 550               |
| McKelvey & Zavoina $R^2$ ,<br>within variance only | 0.002             | 0.014                                | 0.008                                        | 0.001             |

**Notes:** Rank-ordered logit regressions of choice and SWB orderings on residency characteristics. Residencies were matched to CNN Money 2012 city rankings and their recorded city characteristics. For details on these data and variable definitions, see <http://money.cnn.com/magazines/moneymag/best-places/2012/faq/>. “On U.S. News Honor Roll” is a dummy variable which indicates residency programs associated with one of U.S. News and World Report’s “Honor Roll” hospitals. As can be seen by the small and generally insignificant point-estimates, as well as the extremely low  $R^2$ s, these variables are generally not predictive of individual residency preference rankings or SWB rankings.

Table A12: Table 2 Restricted to 4-Period-Happiness Index Estimation Sample

|                                                                        | (1)<br>Choice   | (2)<br>Happiness<br>during<br>residency | (3)<br>Life<br>satisfaction<br>during<br>residency | (4)<br>Ladder   | (5)<br>4-period-<br>happiness<br>index | (6)<br>3-SWB-<br>measure<br>index | (7)<br>6-SWB-<br>question<br>index |
|------------------------------------------------------------------------|-----------------|-----------------------------------------|----------------------------------------------------|-----------------|----------------------------------------|-----------------------------------|------------------------------------|
| Residency<br>prestige and<br>status                                    | 2.6***<br>(0.5) | -0.1<br>(0.5)                           | 0.5<br>(0.5)                                       | 1.1**<br>(0.5)  | 0.3<br>(0.4)                           | 1.6***<br>(0.4)                   | 1.1**<br>(0.4)                     |
| Social life<br>during residency                                        | 1.6***<br>(0.4) | 3.4***<br>(0.5)                         | 2.9***<br>(0.5)                                    | 3.4***<br>(0.5) | 2.6***<br>(0.4)                        | 3.7***<br>(0.5)                   | 3.5***<br>(0.5)                    |
| Desirability of<br>location                                            | 1.4***<br>(0.3) | 0.3<br>(0.3)                            | 1.6***<br>(0.3)                                    | 1.8***<br>(0.3) | 0.5*<br>(0.3)                          | 1.9***<br>(0.3)                   | 1.6***<br>(0.3)                    |
| Anxiety during<br>residency                                            | -0.7*<br>(0.4)  | -1.4***<br>(0.5)                        | -0.5<br>(0.5)                                      | -1.0**<br>(0.5) | -1.8***<br>(0.4)                       | -0.9**<br>(0.4)                   | -1.4***<br>(0.4)                   |
| Worthwhile life<br>during residency                                    | 4.6***<br>(0.7) | 7.2***<br>(0.9)                         | 7.1***<br>(0.9)                                    | 6.5***<br>(0.9) | 5.9***<br>(0.7)                        | 7.0***<br>(0.8)                   | 6.9***<br>(0.8)                    |
| Stress during<br>residency                                             | 0.7<br>(0.4)    | -0.8*<br>(0.5)                          | -0.8<br>(0.5)                                      | -0.3<br>(0.5)   | 0.5<br>(0.4)                           | -0.6<br>(0.4)                     | 0.0<br>(0.4)                       |
| Future career<br>prospects                                             | 3.1***<br>(0.7) | 1.5**<br>(0.7)                          | 2.7***<br>(0.8)                                    | 3.2***<br>(0.7) | 1.2**<br>(0.6)                         | 2.5***<br>(0.7)                   | 2.8***<br>(0.7)                    |
| Control over life                                                      | 0.5<br>(0.4)    | 1.5***<br>(0.5)                         | 1.5***<br>(0.5)                                    | 1.1**<br>(0.5)  | 1.0**<br>(0.4)                         | 1.5***<br>(0.4)                   | 1.5***<br>(0.4)                    |
| Desirable for<br>significant other                                     | 3.2***<br>(0.4) | 0.3<br>(0.3)                            | 0.9**<br>(0.4)                                     | 1.1***<br>(0.4) | 0.3<br>(0.3)                           | 1.2***<br>(0.3)                   | 0.9***<br>(0.3)                    |
| # Observations                                                         | 1591            | 1591                                    | 1591                                               | 1590            | 1591                                   | 1590                              | 1590                               |
| # Students                                                             | 540             | 540                                     | 540                                                | 540             | 540                                    | 540                               | 540                                |
| McKelvey &<br>Zavoina $R^2$ ,<br>within variance<br>only               | 0.42            | 0.33                                    | 0.39                                               | 0.42            | 0.25                                   | 0.45                              | 0.42                               |
| Joint<br>significance of<br>differences with<br>choice<br>coefficients |                 | 0.000                                   | 0.000                                              | 0.000           | 0.000                                  | 0.000                             | 0.000                              |

**Notes:** This table replicates table 2, with the sample restricted to the observations available in column 5 of table 2. \*  $p < .1$ , \*\*  $p < .05$ , \*\*\*  $p < .01$

Table A13: Table 3 Restricted to 4-Period-Happiness Index Estimation Sample

|                                                                  | (1)<br>Choice   | (2)<br>Happiness<br>during<br>residency | (3)<br>Life<br>satisfaction<br>during<br>residency | (4)<br>Ladder   | (5)<br>4-period-<br>happiness<br>index | (6)<br>3-SWB-<br>measure<br>index | (7)<br>6-SWB-<br>question<br>index |
|------------------------------------------------------------------|-----------------|-----------------------------------------|----------------------------------------------------|-----------------|----------------------------------------|-----------------------------------|------------------------------------|
| Residency prestige<br>and status                                 | 1.3***<br>(0.2) | -0.1<br>(0.3)                           | 0.3<br>(0.2)                                       | 0.5**<br>(0.2)  | 0.2<br>(0.3)                           | 0.7***<br>(0.2)                   | 0.5**<br>(0.2)                     |
| Social life during<br>residency                                  | 0.8***<br>(0.2) | 1.8***<br>(0.3)                         | 1.4***<br>(0.2)                                    | 1.6***<br>(0.2) | 1.7***<br>(0.3)                        | 1.6***<br>(0.2)                   | 1.6***<br>(0.2)                    |
| Desirability of<br>location                                      | 0.7***<br>(0.2) | 0.2<br>(0.2)                            | 0.8***<br>(0.2)                                    | 0.8***<br>(0.2) | 0.3*<br>(0.2)                          | 0.8***<br>(0.1)                   | 0.7***<br>(0.1)                    |
| Anxiety during<br>residency                                      | -0.3*<br>(0.2)  | -0.8***<br>(0.3)                        | -0.2<br>(0.2)                                      | -0.5**<br>(0.2) | -1.1***<br>(0.2)                       | -0.4**<br>(0.2)                   | -0.6***<br>(0.2)                   |
| Worthwhile life<br>during residency                              | 2.2***<br>(0.3) | 3.9***<br>(0.5)                         | 3.5***<br>(0.4)                                    | 3.0***<br>(0.3) | 3.7***<br>(0.4)                        | 3.0***<br>(0.3)                   | 3.2***<br>(0.3)                    |
| Stress during<br>residency                                       | 0.3<br>(0.2)    | -0.5*<br>(0.3)                          | -0.4<br>(0.2)                                      | -0.2<br>(0.2)   | 0.3<br>(0.3)                           | -0.3<br>(0.2)                     | 0.0<br>(0.2)                       |
| Future career<br>prospects                                       | 1.5***<br>(0.3) | 0.8**<br>(0.4)                          | 1.3***<br>(0.4)                                    | 1.5***<br>(0.3) | 0.8**<br>(0.4)                         | 1.1***<br>(0.3)                   | 1.3***<br>(0.3)                    |
| Control over life                                                | 0.3<br>(0.2)    | 0.8***<br>(0.2)                         | 0.7***<br>(0.2)                                    | 0.5**<br>(0.2)  | 0.6**<br>(0.3)                         | 0.6***<br>(0.2)                   | 0.7***<br>(0.2)                    |
| Desirable for<br>significant other                               | 1.6***<br>(0.2) | 0.2<br>(0.2)                            | 0.4**<br>(0.2)                                     | 0.5***<br>(0.2) | 0.2<br>(0.2)                           | 0.5***<br>(0.1)                   | 0.4***<br>(0.1)                    |
| # Observations                                                   | 1591            | 1591                                    | 1591                                               | 1590            | 1591                                   | 1590                              | 1590                               |
| # Students                                                       | 540             | 540                                     | 540                                                | 540             | 540                                    | 540                               | 540                                |
| Joint significance of<br>differences with<br>choice coefficients |                 | 0.000                                   | 0.000                                              | 0.000           | 0.000                                  | 0.000                             | 0.000                              |

**Notes:** This table replicates table 3, with the sample restricted to the observations available in column 5 of table 3. \*  $p < .1$ , \*\*  $p < .05$ , \*\*\*  $p < .01$

Table A14: Table 5 Restricted to First-Ranked vs. Second-Ranked Comparisons

|                                            | (1)                                                                   | (2)                                     | (3)                                 | (4)                                                                                                             | (5)                                  |
|--------------------------------------------|-----------------------------------------------------------------------|-----------------------------------------|-------------------------------------|-----------------------------------------------------------------------------------------------------------------|--------------------------------------|
|                                            | Preferred<br>program rates<br>higher<br>(Correct-<br>prediction rate) | The two<br>programs have<br>same rating | Preferred<br>program rates<br>lower | Conditional<br>correct-prediction<br>rate<br>$\left(\frac{\text{column (1)}}{100\% - \text{column (2)}}\right)$ | # Pairwise<br>program<br>comparisons |
| Happiness during residency                 | 48%                                                                   | 30%                                     | 22%                                 | 69%                                                                                                             | 551                                  |
| Life satisfaction during residency         | 54%                                                                   | 28%                                     | 19%                                 | 74%                                                                                                             | 553                                  |
| Ladder                                     | 59%                                                                   | 24%                                     | 17%                                 | 78%                                                                                                             | 553                                  |
| Residency prestige and status              | 50%                                                                   | 20%                                     | 30%                                 | 63%                                                                                                             | 552                                  |
| Social life during residency               | 50%                                                                   | 23%                                     | 27%                                 | 65%                                                                                                             | 553                                  |
| Desirability of location                   | 56%                                                                   | 22%                                     | 22%                                 | 72%                                                                                                             | 552                                  |
| Anxiety during residency                   | 33%                                                                   | 32%                                     | 36%                                 | 48%                                                                                                             | 550                                  |
| Worthwhile life during residency           | 41%                                                                   | 41%                                     | 18%                                 | 69%                                                                                                             | 551                                  |
| Stress during residency                    | 39%                                                                   | 26%                                     | 35%                                 | 52%                                                                                                             | 551                                  |
| Future career prospects                    | 43%                                                                   | 36%                                     | 21%                                 | 67%                                                                                                             | 553                                  |
| Control over life                          | 41%                                                                   | 30%                                     | 29%                                 | 59%                                                                                                             | 550                                  |
| Desirable for significant other            | 58%                                                                   | 21%                                     | 21%                                 | 73%                                                                                                             | 355                                  |
| Average happiness in first 10<br>years     | 31%                                                                   | 56%                                     | 13%                                 | 71%                                                                                                             | 537                                  |
| Average happiness in rest of<br>career     | 30%                                                                   | 55%                                     | 15%                                 | 66%                                                                                                             | 538                                  |
| Average happiness after<br>retirement      | 22%                                                                   | 62%                                     | 16%                                 | 58%                                                                                                             | 538                                  |
| 4-period-happiness index                   | 61%                                                                   | 11%                                     | 28%                                 | 68%                                                                                                             | 534                                  |
| 3-SWB-measure index                        | 71%                                                                   | 5%                                      | 24%                                 | 75%                                                                                                             | 551                                  |
| 6-SWB-question index                       | 74%                                                                   | 2%                                      | 24%                                 | 76%                                                                                                             | 534                                  |
| 12-question index<br>(3 SWB + 9 attribute) | 78%                                                                   | 0%                                      | 22%                                 | 78%                                                                                                             | 544                                  |
| 15-question index<br>(6 SWB + 9 attribute) | 81%                                                                   | 0%                                      | 19%                                 | 81%                                                                                                             | 529                                  |

**Notes:** This table replicates table 5, with the data restricted to only binary comparisons of the first- and second-ranked programs.

Table A15: Table 5 Restricted to First-Ranked vs. Third-Ranked Comparisons

|                                            | (1)<br>Preferred<br>program rates<br>higher<br>(Correct-<br>prediction rate) | (2)<br>The two<br>programs have<br>same rating | (3)<br>Preferred<br>program rates<br>lower | (4)<br>Conditional<br>correct-prediction<br>rate<br>$\left(\frac{\text{column (1)}}{100\% - \text{column (2)}}\right)$ | (5)<br># Pairwise<br>program<br>comparisons |
|--------------------------------------------|------------------------------------------------------------------------------|------------------------------------------------|--------------------------------------------|------------------------------------------------------------------------------------------------------------------------|---------------------------------------------|
| Happiness during residency                 | 58%                                                                          | 24%                                            | 18%                                        | 77%                                                                                                                    | 544                                         |
| Life satisfaction during residency         | 68%                                                                          | 21%                                            | 11%                                        | 86%                                                                                                                    | 544                                         |
| Ladder                                     | 76%                                                                          | 13%                                            | 11%                                        | 87%                                                                                                                    | 544                                         |
| Residency prestige and status              | 59%                                                                          | 18%                                            | 23%                                        | 72%                                                                                                                    | 544                                         |
| Social life during residency               | 57%                                                                          | 21%                                            | 22%                                        | 72%                                                                                                                    | 545                                         |
| Desirability of location                   | 68%                                                                          | 13%                                            | 19%                                        | 78%                                                                                                                    | 543                                         |
| Anxiety during residency                   | 38%                                                                          | 30%                                            | 32%                                        | 55%                                                                                                                    | 543                                         |
| Worthwhile life during residency           | 46%                                                                          | 41%                                            | 13%                                        | 78%                                                                                                                    | 542                                         |
| Stress during residency                    | 43%                                                                          | 26%                                            | 31%                                        | 58%                                                                                                                    | 543                                         |
| Future career prospects                    | 55%                                                                          | 29%                                            | 16%                                        | 77%                                                                                                                    | 545                                         |
| Control over life                          | 44%                                                                          | 28%                                            | 28%                                        | 61%                                                                                                                    | 543                                         |
| Desirable for significant other            | 75%                                                                          | 12%                                            | 13%                                        | 85%                                                                                                                    | 351                                         |
| Average happiness in first 10 years        | 39%                                                                          | 51%                                            | 10%                                        | 80%                                                                                                                    | 534                                         |
| Average happiness in rest of career        | 33%                                                                          | 53%                                            | 14%                                        | 69%                                                                                                                    | 533                                         |
| Average happiness after retirement         | 25%                                                                          | 63%                                            | 12%                                        | 68%                                                                                                                    | 534                                         |
| 4-period-happiness index                   | 71%                                                                          | 8%                                             | 21%                                        | 77%                                                                                                                    | 529                                         |
| 3-SWB-measure index                        | 84%                                                                          | 3%                                             | 12%                                        | 87%                                                                                                                    | 541                                         |
| 6-SWB-question index                       | 86%                                                                          | 2%                                             | 13%                                        | 87%                                                                                                                    | 527                                         |
| 12-question index<br>(3 SWB + 9 attribute) | 89%                                                                          | 0%                                             | 11%                                        | 89%                                                                                                                    | 530                                         |
| 15-question index<br>(6 SWB + 9 attribute) | 89%                                                                          | 0%                                             | 11%                                        | 89%                                                                                                                    | 518                                         |

**Notes:** This table replicates table 5, with the data restricted to only binary comparisons of the first- and third-ranked programs.



Table A16: Table 5 Restricted to First-Ranked vs. Fourth-Ranked Comparisons

|                                            | (1)                                                                   | (2)                                     | (3)                                 | (4)                                                                                                             | (5)                                  |
|--------------------------------------------|-----------------------------------------------------------------------|-----------------------------------------|-------------------------------------|-----------------------------------------------------------------------------------------------------------------|--------------------------------------|
|                                            | Preferred<br>program rates<br>higher<br>(Correct-<br>prediction rate) | The two<br>programs have<br>same rating | Preferred<br>program rates<br>lower | Conditional<br>correct-prediction<br>rate<br>$\left(\frac{\text{column (1)}}{100\% - \text{column (2)}}\right)$ | # Pairwise<br>program<br>comparisons |
| Happiness during residency                 | 63%                                                                   | 22%                                     | 15%                                 | 81%                                                                                                             | 533                                  |
| Life satisfaction during<br>residency      | 73%                                                                   | 18%                                     | 9%                                  | 90%                                                                                                             | 536                                  |
| Ladder                                     | 79%                                                                   | 12%                                     | 9%                                  | 90%                                                                                                             | 536                                  |
| Residency prestige and status              | 68%                                                                   | 10%                                     | 22%                                 | 76%                                                                                                             | 535                                  |
| Social life during residency               | 62%                                                                   | 17%                                     | 21%                                 | 74%                                                                                                             | 536                                  |
| Desirability of location                   | 74%                                                                   | 9%                                      | 17%                                 | 81%                                                                                                             | 535                                  |
| Anxiety during residency                   | 41%                                                                   | 35%                                     | 34%                                 | 55%                                                                                                             | 533                                  |
| Worthwhile life during residency           | 55%                                                                   | 35%                                     | 10%                                 | 85%                                                                                                             | 535                                  |
| Stress during residency                    | 42%                                                                   | 24%                                     | 34%                                 | 55%                                                                                                             | 533                                  |
| Future career prospects                    | 63%                                                                   | 22%                                     | 15%                                 | 81%                                                                                                             | 536                                  |
| Control over life                          | 47%                                                                   | 27%                                     | 26%                                 | 64%                                                                                                             | 533                                  |
| Desirable for significant other            | 78%                                                                   | 9%                                      | 13%                                 | 86%                                                                                                             | 344                                  |
| 3-SWB-measure index                        | 88%                                                                   | 1%                                      | 11%                                 | 89%                                                                                                             | 533                                  |
| 12-question index<br>(3 SWB + 9 attribute) | 92%                                                                   | 0%                                      | 8%                                  | 92%                                                                                                             | 525                                  |

**Notes:** This table replicates table 5, with the data restricted to only binary comparisons of the first- and fourth-ranked programs.

### Table 3 by different sample cuts

The tables are the same as table 3, but with the sample restricted to various subpopulations as described in section III.B.

|                                                                                                                                                                 |    |
|-----------------------------------------------------------------------------------------------------------------------------------------------------------------|----|
| Table 3 restricted to single respondents .....                                                                                                                  | 19 |
| Table 3 restricted to respondents in a long-term relationship .....                                                                                             | 20 |
| Table 3 restricted to married respondents .....                                                                                                                 | 21 |
| Table 3 restricted to men.....                                                                                                                                  | 22 |
| Table 3 restricted to women.....                                                                                                                                | 23 |
| Table 3 restricted to above-median MCAT scores .....                                                                                                            | 24 |
| Table 3 restricted to below-median MCAT scores .....                                                                                                            | 25 |
| Table 3 restricted to above-median age .....                                                                                                                    | 26 |
| Table 3 restricted to below-median age .....                                                                                                                    | 27 |
| Table 3 restricted to above-median survey completion time .....                                                                                                 | 28 |
| Table 3 restricted to below-median survey completion time .....                                                                                                 | 29 |
| Table 3 restricted to respondents who agreed to be re-contacted .....                                                                                           | 31 |
| Table 3 restricted to respondents who participated in follow-up survey .....                                                                                    | 32 |
| Table 3 restricted to respondents who did not participate in follow-up survey .....                                                                             | 33 |
| Table 3 restricted to respondents who did not participate in the dual match .....                                                                               | 34 |
| Table 3 restricted to respondents who did not report manipulation attempts by the school .....                                                                  | 35 |
| Table 3 restricted to respondents who felt their NRMP choice order represented their true preferences.....                                                      | 36 |
| Table 3 restricted to respondents who did not feel that their NRMP choice order represented their true preferences, using their reported true preferences ..... | 37 |

Table 3 restricted to single respondents

|                                                                  | (1)<br>Choice   | (2)<br>Happiness<br>during<br>residency | (3)<br>Life<br>satisfaction<br>during<br>residency | (4)<br>Ladder    | (5)<br>4-period-<br>happiness<br>index | (6)<br>3-SWB-<br>measure<br>index | (7)<br>6-SWB-<br>question<br>index |
|------------------------------------------------------------------|-----------------|-----------------------------------------|----------------------------------------------------|------------------|----------------------------------------|-----------------------------------|------------------------------------|
| Residency prestige<br>and status                                 | 1.7***<br>(0.4) | -0.5*<br>(0.3)                          | 0.3<br>(0.4)                                       | 0.2<br>(0.3)     | 0.0<br>(0.5)                           | 0.4<br>(0.3)                      | 0.8*<br>(0.4)                      |
| Social life during<br>residency                                  | 0.5*<br>(0.3)   | 1.8***<br>(0.3)                         | 1.6***<br>(0.3)                                    | 1.8***<br>(0.3)  | 1.7***<br>(0.4)                        | 2.0***<br>(0.3)                   | 1.4***<br>(0.3)                    |
| Desirability of<br>location                                      | 1.2***<br>(0.3) | 0.1<br>(0.2)                            | 1.1***<br>(0.3)                                    | 0.9***<br>(0.2)  | 0.4<br>(0.3)                           | 1.1***<br>(0.2)                   | 1.0***<br>(0.3)                    |
| Anxiety during<br>residency                                      | 0.4<br>(0.3)    | -0.6**<br>(0.3)                         | -0.2<br>(0.4)                                      | -0.2<br>(0.3)    | -1.1**<br>(0.4)                        | -0.4<br>(0.3)                     | -0.8**<br>(0.4)                    |
| Worthwhile life<br>during residency                              | 2.5***<br>(0.5) | 3.3***<br>(0.5)                         | 3.9***<br>(0.6)                                    | 3.1***<br>(0.4)  | 3.8***<br>(0.7)                        | 3.0***<br>(0.4)                   | 3.0***<br>(0.6)                    |
| Stress during<br>residency                                       | -0.6*<br>(0.3)  | -1.0***<br>(0.3)                        | -0.4<br>(0.4)                                      | -0.9***<br>(0.3) | -0.2<br>(0.5)                          | -0.7**<br>(0.3)                   | -0.1<br>(0.4)                      |
| Future career<br>prospects                                       | 1.8***<br>(0.5) | 1.0**<br>(0.4)                          | 1.5***<br>(0.5)                                    | 1.6***<br>(0.4)  | 0.8<br>(0.6)                           | 1.1***<br>(0.4)                   | 0.7<br>(0.6)                       |
| Control over life                                                | 0.4<br>(0.3)    | 0.7***<br>(0.3)                         | -0.1<br>(0.3)                                      | 0.3<br>(0.3)     | 0.9**<br>(0.4)                         | 0.3<br>(0.2)                      | 1.1***<br>(0.4)                    |
| Desirable for<br>significant other                               | 0.0<br>(0.0)    | 0.0<br>(0.0)                            | 0.0<br>(0.0)                                       | 0.0<br>(0.0)     | 0.0<br>(0.0)                           | 0.0<br>(0.0)                      | 0.0<br>(0.0)                       |
| # Observations                                                   | 771             | 770                                     | 771                                                | 770              | 564                                    | 769                               | 563                                |
| # Students                                                       | 199             | 199                                     | 199                                                | 199              | 192                                    | 199                               | 192                                |
| Joint significance of<br>differences with<br>choice coefficients |                 | 0.000                                   | 0.000                                              | 0.000            | 0.000                                  | 0.000                             | 0.000                              |

**Notes:** This table replicates table 3 with the sample restriction indicated in the table title. \*  $p < .1$ , \*\*  $p < .05$ , \*\*\*  $p < .01$

Table 3 restricted to respondents in a long-term relationship

|                                                                  | (1)<br>Choice   | (2)<br>Happiness<br>during<br>residency | (3)<br>Life<br>satisfaction<br>during<br>residency | (4)<br>Ladder    | (5)<br>4-period-<br>happiness<br>index | (6)<br>3-SWB-<br>measure<br>index | (7)<br>6-SWB-<br>question<br>index |
|------------------------------------------------------------------|-----------------|-----------------------------------------|----------------------------------------------------|------------------|----------------------------------------|-----------------------------------|------------------------------------|
| Residency prestige<br>and status                                 | 1.6***<br>(0.4) | 0.5<br>(0.4)                            | 0.6**<br>(0.3)                                     | 0.8**<br>(0.3)   | 0.9**<br>(0.4)                         | 0.6**<br>(0.3)                    | 0.6*<br>(0.3)                      |
| Social life during<br>residency                                  | 1.1***<br>(0.3) | 2.8***<br>(0.4)                         | 2.0***<br>(0.3)                                    | 1.5***<br>(0.3)  | 2.4***<br>(0.6)                        | 1.7***<br>(0.3)                   | 1.5***<br>(0.3)                    |
| Desirability of<br>location                                      | 1.2***<br>(0.2) | 0.6**<br>(0.3)                          | 1.3***<br>(0.2)                                    | 1.1***<br>(0.2)  | 0.3<br>(0.3)                           | 1.1***<br>(0.2)                   | 0.8***<br>(0.2)                    |
| Anxiety during<br>residency                                      | -0.4<br>(0.3)   | -0.9***<br>(0.3)                        | -0.3<br>(0.3)                                      | -0.7***<br>(0.3) | -1.4***<br>(0.5)                       | -0.6***<br>(0.2)                  | -0.8***<br>(0.3)                   |
| Worthwhile life<br>during residency                              | 1.9***<br>(0.4) | 3.5***<br>(0.5)                         | 3.6***<br>(0.5)                                    | 3.4***<br>(0.4)  | 3.6***<br>(0.8)                        | 3.4***<br>(0.4)                   | 3.8***<br>(0.5)                    |
| Stress during<br>residency                                       | 0.2<br>(0.3)    | -0.7*<br>(0.4)                          | -0.4<br>(0.3)                                      | -0.1<br>(0.3)    | 0.2<br>(0.5)                           | -0.2<br>(0.3)                     | 0.0<br>(0.3)                       |
| Future career<br>prospects                                       | 1.2***<br>(0.5) | 0.1<br>(0.5)                            | 0.6<br>(0.4)                                       | 1.0**<br>(0.4)   | -0.0<br>(0.7)                          | 1.0**<br>(0.4)                    | 0.5<br>(0.5)                       |
| Control over life                                                | -0.2<br>(0.3)   | 0.0<br>(0.4)                            | 0.1<br>(0.3)                                       | 0.2<br>(0.3)     | 0.2<br>(0.5)                           | -0.1<br>(0.3)                     | 0.6*<br>(0.3)                      |
| Desirable for<br>significant other                               | 1.2***<br>(0.2) | 0.1<br>(0.2)                            | 0.1<br>(0.2)                                       | 0.3**<br>(0.2)   | 0.0<br>(0.3)                           | 0.4**<br>(0.2)                    | 0.3*<br>(0.2)                      |
| # Observations                                                   | 754             | 753                                     | 754                                                | 754              | 558                                    | 753                               | 558                                |
| # Students                                                       | 192             | 192                                     | 192                                                | 192              | 189                                    | 192                               | 189                                |
| Joint significance of<br>differences with<br>choice coefficients |                 | 0.000                                   | 0.000                                              | 0.000            | 0.000                                  | 0.000                             | 0.000                              |

**Notes:** This table replicates table 3 with the sample restriction indicated in the table title. \*  $p < .1$ , \*\*  $p < .05$ , \*\*\*  $p < .01$

Table 3 restricted to married respondents

|                                                                  | (1)<br>Choice   | (2)<br>Happiness<br>during<br>residency | (3)<br>Life<br>satisfaction<br>during<br>residency | (4)<br>Ladder   | (5)<br>4-period-<br>happiness<br>index | (6)<br>3-SWB-<br>measure<br>index | (7)<br>6-SWB-<br>question<br>index |
|------------------------------------------------------------------|-----------------|-----------------------------------------|----------------------------------------------------|-----------------|----------------------------------------|-----------------------------------|------------------------------------|
| Residency prestige<br>and status                                 | 0.9***<br>(0.2) | 0.2<br>(0.4)                            | 0.2<br>(0.3)                                       | 0.3<br>(0.3)    | -0.2<br>(0.3)                          | 0.3<br>(0.2)                      | 0.2<br>(0.3)                       |
| Social life during<br>residency                                  | 0.7***<br>(0.2) | 1.4***<br>(0.4)                         | 0.9***<br>(0.3)                                    | 1.6***<br>(0.3) | 0.9**<br>(0.4)                         | 1.5***<br>(0.3)                   | 1.9***<br>(0.4)                    |
| Desirability of<br>location                                      | 0.3*<br>(0.2)   | 0.0<br>(0.3)                            | 0.4<br>(0.2)                                       | 0.7**<br>(0.3)  | 0.2<br>(0.3)                           | 0.5***<br>(0.2)                   | 0.5**<br>(0.3)                     |
| Anxiety during<br>residency                                      | -0.4*<br>(0.2)  | -0.8*<br>(0.5)                          | -0.3<br>(0.4)                                      | -0.4<br>(0.4)   | -0.8**<br>(0.4)                        | -0.2<br>(0.3)                     | -0.2<br>(0.3)                      |
| Worthwhile life<br>during residency                              | 2.9***<br>(0.4) | 4.9***<br>(0.7)                         | 4.3***<br>(0.5)                                    | 2.9***<br>(0.5) | 3.7***<br>(0.7)                        | 3.3***<br>(0.5)                   | 2.8***<br>(0.5)                    |
| Stress during<br>residency                                       | 0.3<br>(0.2)    | -0.0<br>(0.4)                           | -0.4<br>(0.3)                                      | 0.1<br>(0.3)    | 0.9***<br>(0.3)                        | -0.2<br>(0.3)                     | 0.1<br>(0.3)                       |
| Future career<br>prospects                                       | 1.9***<br>(0.3) | 0.3<br>(0.6)                            | 1.0**<br>(0.5)                                     | 2.1***<br>(0.5) | 1.2**<br>(0.5)                         | 1.7***<br>(0.4)                   | 2.5***<br>(0.5)                    |
| Control over life                                                | 0.3<br>(0.2)    | 0.8**<br>(0.4)                          | 0.7***<br>(0.3)                                    | 0.0<br>(0.3)    | 0.7*<br>(0.4)                          | 0.3<br>(0.2)                      | 0.3<br>(0.3)                       |
| Desirable for<br>significant other                               | 1.2***<br>(0.2) | 0.6**<br>(0.3)                          | 0.7***<br>(0.3)                                    | 0.8***<br>(0.3) | 0.5*<br>(0.3)                          | 1.0***<br>(0.2)                   | 0.6**<br>(0.2)                     |
| # Observations                                                   | 644             | 644                                     | 644                                                | 644             | 469                                    | 644                               | 469                                |
| # Students                                                       | 166             | 166                                     | 166                                                | 166             | 159                                    | 166                               | 159                                |
| Joint significance of<br>differences with<br>choice coefficients |                 | 0.000                                   | 0.000                                              | 0.047           | 0.000                                  | 0.003                             | 0.036                              |

**Notes:** This table replicates table 3 with the sample restriction indicated in the table title. \*  $p < .1$ , \*\*  $p < .05$ , \*\*\*  $p < .01$

Table 3 restricted to men

|                                                                  | (1)<br>Choice   | (2)<br>Happiness<br>during<br>residency | (3)<br>Life<br>satisfaction<br>during<br>residency | (4)<br>Ladder   | (5)<br>4-period-<br>happiness<br>index | (6)<br>3-SWB-<br>measure<br>index | (7)<br>6-SWB-<br>question<br>index |
|------------------------------------------------------------------|-----------------|-----------------------------------------|----------------------------------------------------|-----------------|----------------------------------------|-----------------------------------|------------------------------------|
| Residency prestige<br>and status                                 | 1.7***<br>(0.3) | 0.4<br>(0.3)                            | 0.5*<br>(0.3)                                      | 0.6**<br>(0.3)  | 0.5<br>(0.3)                           | 0.8***<br>(0.2)                   | 0.7**<br>(0.3)                     |
| Social life during<br>residency                                  | 0.9***<br>(0.2) | 1.8***<br>(0.3)                         | 1.3***<br>(0.3)                                    | 1.6***<br>(0.2) | 1.4***<br>(0.3)                        | 1.6***<br>(0.2)                   | 1.4***<br>(0.3)                    |
| Desirability of<br>location                                      | 0.9***<br>(0.2) | 0.5**<br>(0.2)                          | 1.1***<br>(0.2)                                    | 1.1***<br>(0.2) | 0.4*<br>(0.2)                          | 1.1***<br>(0.2)                   | 0.8***<br>(0.2)                    |
| Anxiety during<br>residency                                      | -0.0<br>(0.2)   | -0.9***<br>(0.3)                        | 0.0<br>(0.3)                                       | -0.4<br>(0.2)   | -1.0***<br>(0.3)                       | -0.4**<br>(0.2)                   | -0.5*<br>(0.3)                     |
| Worthwhile life<br>during residency                              | 2.6***<br>(0.4) | 3.8***<br>(0.5)                         | 4.3***<br>(0.5)                                    | 2.6***<br>(0.4) | 4.0***<br>(0.5)                        | 2.9***<br>(0.3)                   | 3.2***<br>(0.4)                    |
| Stress during<br>residency                                       | -0.1<br>(0.2)   | -0.4<br>(0.3)                           | -0.1<br>(0.3)                                      | -0.1<br>(0.3)   | 0.7**<br>(0.3)                         | -0.1<br>(0.2)                     | 0.2<br>(0.3)                       |
| Future career<br>prospects                                       | 1.5***<br>(0.4) | 0.3<br>(0.4)                            | 1.2***<br>(0.4)                                    | 1.8***<br>(0.4) | 0.6<br>(0.5)                           | 1.3***<br>(0.3)                   | 1.3***<br>(0.4)                    |
| Control over life                                                | 0.0<br>(0.2)    | 0.5**<br>(0.3)                          | -0.0<br>(0.2)                                      | 0.0<br>(0.2)    | 0.2<br>(0.3)                           | 0.0<br>(0.2)                      | 0.2<br>(0.3)                       |
| Desirable for<br>significant other                               | 1.2***<br>(0.2) | 0.4<br>(0.2)                            | 0.4*<br>(0.2)                                      | 0.7***<br>(0.2) | 0.2<br>(0.3)                           | 0.8***<br>(0.2)                   | 0.6***<br>(0.2)                    |
| # Observations                                                   | 1146            | 1144                                    | 1146                                               | 1145            | 846                                    | 1143                              | 845                                |
| # Students                                                       | 294             | 294                                     | 294                                                | 294             | 286                                    | 294                               | 286                                |
| Joint significance of<br>differences with<br>choice coefficients |                 | 0.000                                   | 0.000                                              | 0.002           | 0.000                                  | 0.000                             | 0.010                              |

**Notes:** This table replicates table 3 with the sample restriction indicated in the table title. \*  $p < .1$ , \*\*  $p < .05$ , \*\*\*  $p < .01$

Table 3 restricted to women

|                                                                  | (1)<br>Choice   | (2)<br>Happiness<br>during<br>residency | (3)<br>Life<br>satisfaction<br>during<br>residency | (4)<br>Ladder   | (5)<br>4-period-<br>happiness<br>index | (6)<br>3-SWB-<br>measure<br>index | (7)<br>6-SWB-<br>question<br>index |
|------------------------------------------------------------------|-----------------|-----------------------------------------|----------------------------------------------------|-----------------|----------------------------------------|-----------------------------------|------------------------------------|
| Residency prestige<br>and status                                 | 1.1***<br>(0.2) | -0.3<br>(0.2)                           | 0.3<br>(0.2)                                       | 0.3<br>(0.2)    | -0.1<br>(0.4)                          | 0.1<br>(0.2)                      | 0.3<br>(0.2)                       |
| Social life during<br>residency                                  | 0.7***<br>(0.2) | 2.2***<br>(0.3)                         | 1.6***<br>(0.3)                                    | 1.5***<br>(0.2) | 1.7***<br>(0.5)                        | 1.8***<br>(0.2)                   | 1.7***<br>(0.3)                    |
| Desirability of<br>location                                      | 1.0***<br>(0.2) | -0.0<br>(0.2)                           | 0.8***<br>(0.2)                                    | 0.7***<br>(0.2) | 0.3<br>(0.3)                           | 0.7***<br>(0.2)                   | 0.6***<br>(0.2)                    |
| Anxiety during<br>residency                                      | -0.3<br>(0.2)   | -0.5*<br>(0.3)                          | -0.5**<br>(0.2)                                    | -0.4*<br>(0.2)  | -1.1***<br>(0.4)                       | -0.3<br>(0.2)                     | -0.7***<br>(0.2)                   |
| Worthwhile life<br>during residency                              | 2.1***<br>(0.4) | 3.8***<br>(0.5)                         | 3.3***<br>(0.4)                                    | 3.8***<br>(0.3) | 3.2***<br>(0.6)                        | 3.5***<br>(0.3)                   | 2.9***<br>(0.4)                    |
| Stress during<br>residency                                       | -0.1<br>(0.2)   | -0.9***<br>(0.3)                        | -0.8***<br>(0.3)                                   | -0.5**<br>(0.2) | -0.3<br>(0.4)                          | -0.7***<br>(0.2)                  | -0.3<br>(0.2)                      |
| Future career<br>prospects                                       | 1.8***<br>(0.3) | 0.7*<br>(0.4)                           | 0.7**<br>(0.4)                                     | 1.2***<br>(0.3) | 0.8<br>(0.5)                           | 1.1***<br>(0.3)                   | 1.0***<br>(0.4)                    |
| Control over life                                                | 0.5**<br>(0.2)  | 0.4<br>(0.3)                            | 0.6**<br>(0.2)                                     | 0.4*<br>(0.2)   | 1.2***<br>(0.4)                        | 0.4*<br>(0.2)                     | 1.2***<br>(0.2)                    |
| Desirable for<br>significant other                               | 1.4***<br>(0.2) | 0.2<br>(0.2)                            | 0.3*<br>(0.2)                                      | 0.3**<br>(0.1)  | 0.2<br>(0.2)                           | 0.4***<br>(0.1)                   | 0.3*<br>(0.2)                      |
| # Observations                                                   | 1023            | 1023                                    | 1023                                               | 1023            | 745                                    | 1023                              | 745                                |
| # Students                                                       | 263             | 263                                     | 263                                                | 263             | 254                                    | 263                               | 254                                |
| Joint significance of<br>differences with<br>choice coefficients |                 | 0.000                                   | 0.000                                              | 0.000           | 0.000                                  | 0.000                             | 0.000                              |

**Notes:** This table replicates table 3 with the sample restriction indicated in the table title. \*  $p < .1$ , \*\*  $p < .05$ , \*\*\*  $p < .01$

Table 3 restricted to above-median MCAT scores

|                                                                  | (1)<br>Choice   | (2)<br>Happiness<br>during<br>residency | (3)<br>Life<br>satisfaction<br>during<br>residency | (4)<br>Ladder   | (5)<br>4-period-<br>happiness<br>index | (6)<br>3-SWB-<br>measure<br>index | (7)<br>6-SWB-<br>question<br>index |
|------------------------------------------------------------------|-----------------|-----------------------------------------|----------------------------------------------------|-----------------|----------------------------------------|-----------------------------------|------------------------------------|
| Residency prestige<br>and status                                 | 1.8***<br>(0.3) | -0.1<br>(0.3)                           | 0.6*<br>(0.3)                                      | 0.4*<br>(0.3)   | -0.1<br>(0.4)                          | 0.4*<br>(0.2)                     | 0.6**<br>(0.3)                     |
| Social life during<br>residency                                  | 0.7***<br>(0.2) | 2.2***<br>(0.3)                         | 1.8***<br>(0.3)                                    | 1.6***<br>(0.2) | 1.9***<br>(0.4)                        | 1.9***<br>(0.2)                   | 1.4***<br>(0.3)                    |
| Desirability of<br>location                                      | 0.9***<br>(0.2) | -0.1<br>(0.2)                           | 0.6***<br>(0.2)                                    | 0.7***<br>(0.2) | 0.3<br>(0.2)                           | 0.7***<br>(0.2)                   | 0.7***<br>(0.2)                    |
| Anxiety during<br>residency                                      | 0.2<br>(0.2)    | -0.8***<br>(0.3)                        | -0.2<br>(0.3)                                      | -0.5**<br>(0.2) | -1.3***<br>(0.4)                       | -0.5**<br>(0.2)                   | -1.0***<br>(0.3)                   |
| Worthwhile life<br>during residency                              | 2.8***<br>(0.3) | 3.2***<br>(0.5)                         | 3.8***<br>(0.4)                                    | 2.9***<br>(0.4) | 3.3***<br>(0.6)                        | 3.0***<br>(0.3)                   | 2.8***<br>(0.4)                    |
| Stress during<br>residency                                       | 0.1<br>(0.2)    | -0.9***<br>(0.3)                        | -0.4<br>(0.3)                                      | -0.3<br>(0.2)   | -0.0<br>(0.4)                          | -0.4*<br>(0.2)                    | -0.1<br>(0.3)                      |
| Future career<br>prospects                                       | 1.0***<br>(0.3) | 0.6<br>(0.4)                            | 0.6<br>(0.4)                                       | 1.5***<br>(0.4) | 1.0**<br>(0.5)                         | 1.3***<br>(0.3)                   | 1.1***<br>(0.4)                    |
| Control over life                                                | 0.2<br>(0.2)    | 0.8***<br>(0.3)                         | 0.5*<br>(0.3)                                      | 0.4*<br>(0.2)   | 0.9***<br>(0.4)                        | 0.3<br>(0.2)                      | 0.9***<br>(0.3)                    |
| Desirable for<br>significant other                               | 1.3***<br>(0.2) | 0.4**<br>(0.2)                          | 0.5***<br>(0.2)                                    | 0.6***<br>(0.2) | 0.2<br>(0.2)                           | 0.6***<br>(0.2)                   | 0.4**<br>(0.2)                     |
| # Observations                                                   | 1037            | 1036                                    | 1037                                               | 1037            | 756                                    | 1036                              | 756                                |
| # Students                                                       | 264             | 264                                     | 264                                                | 264             | 256                                    | 264                               | 256                                |
| Joint significance of<br>differences with<br>choice coefficients |                 | 0.000                                   | 0.000                                              | 0.000           | 0.000                                  | 0.000                             | 0.000                              |

**Notes:** This table replicates table 3 with the sample restriction indicated in the table title. \*  $p < .1$ , \*\*  $p < .05$ , \*\*\*  $p < .01$



Table 3 restricted to below-median MCAT scores

|                                                                  | (1)<br>Choice   | (2)<br>Happiness<br>during<br>residency | (3)<br>Life<br>satisfaction<br>during<br>residency | (4)<br>Ladder   | (5)<br>4-period-<br>happiness<br>index | (6)<br>3-SWB-<br>measure<br>index | (7)<br>6-SWB-<br>question<br>index |
|------------------------------------------------------------------|-----------------|-----------------------------------------|----------------------------------------------------|-----------------|----------------------------------------|-----------------------------------|------------------------------------|
| Residency prestige<br>and status                                 | 1.0***<br>(0.2) | 0.0<br>(0.3)                            | 0.2<br>(0.2)                                       | 0.4*<br>(0.2)   | 0.3<br>(0.3)                           | 0.3*<br>(0.2)                     | 0.3<br>(0.3)                       |
| Social life during<br>residency                                  | 0.9***<br>(0.2) | 1.8***<br>(0.3)                         | 1.3***<br>(0.3)                                    | 1.6***<br>(0.2) | 1.5***<br>(0.4)                        | 1.6***<br>(0.2)                   | 1.8***<br>(0.3)                    |
| Desirability of<br>location                                      | 0.9***<br>(0.2) | 0.6***<br>(0.2)                         | 1.3***<br>(0.2)                                    | 1.2***<br>(0.2) | 0.3<br>(0.3)                           | 1.2***<br>(0.2)                   | 0.8***<br>(0.2)                    |
| Anxiety during<br>residency                                      | -0.4*<br>(0.2)  | -0.8***<br>(0.3)                        | -0.3<br>(0.3)                                      | -0.3<br>(0.2)   | -1.0***<br>(0.3)                       | -0.4*<br>(0.2)                    | -0.4<br>(0.2)                      |
| Worthwhile life<br>during residency                              | 1.9***<br>(0.4) | 4.3***<br>(0.5)                         | 3.9***<br>(0.4)                                    | 3.4***<br>(0.4) | 3.8***<br>(0.6)                        | 3.3***<br>(0.3)                   | 3.3***<br>(0.4)                    |
| Stress during<br>residency                                       | -0.2<br>(0.2)   | -0.3<br>(0.3)                           | -0.4<br>(0.3)                                      | -0.2<br>(0.2)   | 0.7**<br>(0.4)                         | -0.2<br>(0.2)                     | 0.2<br>(0.3)                       |
| Future career<br>prospects                                       | 2.1***<br>(0.4) | 0.6<br>(0.4)                            | 1.3***<br>(0.4)                                    | 1.5***<br>(0.3) | 0.8<br>(0.5)                           | 1.3***<br>(0.3)                   | 1.4***<br>(0.4)                    |
| Control over life                                                | 0.2<br>(0.2)    | 0.3<br>(0.3)                            | 0.0<br>(0.3)                                       | -0.0<br>(0.2)   | 0.4<br>(0.4)                           | 0.1<br>(0.2)                      | 0.5*<br>(0.3)                      |
| Desirable for<br>significant other                               | 1.3***<br>(0.2) | 0.2<br>(0.2)                            | 0.3<br>(0.2)                                       | 0.4**<br>(0.2)  | 0.2<br>(0.3)                           | 0.6***<br>(0.2)                   | 0.4*<br>(0.2)                      |
| # Observations                                                   | 1132            | 1131                                    | 1132                                               | 1131            | 835                                    | 1130                              | 834                                |
| # Students                                                       | 293             | 293                                     | 293                                                | 293             | 284                                    | 293                               | 284                                |
| Joint significance of<br>differences with<br>choice coefficients |                 | 0.000                                   | 0.000                                              | 0.000           | 0.000                                  | 0.000                             | 0.000                              |

**Notes:** This table replicates table 3 with the sample restriction indicated in the table title. \*  $p < .1$ , \*\*  $p < .05$ , \*\*\*  $p < .01$

Table 3 restricted to above-median age

|                                                                  | (1)<br>Choice   | (2)<br>Happiness<br>during<br>residency | (3)<br>Life<br>satisfaction<br>during<br>residency | (4)<br>Ladder   | (5)<br>4-period-<br>happiness<br>index | (6)<br>3-SWB-<br>measure<br>index | (7)<br>6-SWB-<br>question<br>index |
|------------------------------------------------------------------|-----------------|-----------------------------------------|----------------------------------------------------|-----------------|----------------------------------------|-----------------------------------|------------------------------------|
| Residency prestige<br>and status                                 | 1.3***<br>(0.2) | 0.1<br>(0.3)                            | 0.1<br>(0.3)                                       | 0.6**<br>(0.3)  | 0.1<br>(0.4)                           | 0.3<br>(0.2)                      | 0.4<br>(0.3)                       |
| Social life during<br>residency                                  | 0.7***<br>(0.2) | 1.7***<br>(0.3)                         | 1.6***<br>(0.3)                                    | 1.5***<br>(0.3) | 1.6***<br>(0.3)                        | 1.7***<br>(0.2)                   | 1.6***<br>(0.2)                    |
| Desirability of<br>location                                      | 0.8***<br>(0.2) | 0.1<br>(0.2)                            | 0.7***<br>(0.2)                                    | 0.8***<br>(0.2) | -0.0<br>(0.2)                          | 0.7***<br>(0.2)                   | 0.6***<br>(0.2)                    |
| Anxiety during<br>residency                                      | 0.1<br>(0.2)    | -1.0***<br>(0.3)                        | -0.2<br>(0.3)                                      | -0.4<br>(0.3)   | -1.1***<br>(0.3)                       | -0.5**<br>(0.2)                   | -0.7***<br>(0.3)                   |
| Worthwhile life<br>during residency                              | 2.4***<br>(0.3) | 3.2***<br>(0.5)                         | 3.3***<br>(0.4)                                    | 2.7***<br>(0.4) | 3.2***<br>(0.6)                        | 2.9***<br>(0.4)                   | 3.1***<br>(0.4)                    |
| Stress during<br>residency                                       | -0.1<br>(0.2)   | -0.6**<br>(0.3)                         | -0.4<br>(0.3)                                      | -0.4<br>(0.3)   | 0.4<br>(0.4)                           | -0.4<br>(0.2)                     | 0.1<br>(0.3)                       |
| Future career<br>prospects                                       | 1.8***<br>(0.3) | 0.8*<br>(0.4)                           | 1.9***<br>(0.4)                                    | 1.8***<br>(0.4) | 1.1**<br>(0.5)                         | 1.6***<br>(0.3)                   | 1.4***<br>(0.4)                    |
| Control over life                                                | 0.3<br>(0.2)    | 0.9***<br>(0.3)                         | 0.2<br>(0.2)                                       | 0.4<br>(0.2)    | 1.1***<br>(0.3)                        | 0.3<br>(0.2)                      | 0.6**<br>(0.3)                     |
| Desirable for<br>significant other                               | 1.3***<br>(0.2) | 0.5**<br>(0.2)                          | 0.5**<br>(0.2)                                     | 0.6***<br>(0.2) | 0.4*<br>(0.2)                          | 0.7***<br>(0.2)                   | 0.5***<br>(0.2)                    |
| # Observations                                                   | 941             | 939                                     | 941                                                | 941             | 701                                    | 939                               | 701                                |
| # Students                                                       | 243             | 243                                     | 243                                                | 243             | 240                                    | 243                               | 240                                |
| Joint significance of<br>differences with<br>choice coefficients |                 | 0.000                                   | 0.000                                              | 0.001           | 0.000                                  | 0.000                             | 0.000                              |

**Notes:** This table replicates table 3 with the sample restriction indicated in the table title. \*  $p < .1$ , \*\*  $p < .05$ , \*\*\*  $p < .01$

Table 3 restricted to below-median age

|                                                                  | (1)<br>Choice   | (2)<br>Happiness<br>during<br>residency | (3)<br>Life<br>satisfaction<br>during<br>residency | (4)<br>Ladder   | (5)<br>4-period-<br>happiness<br>index | (6)<br>3-SWB-<br>measure<br>index | (7)<br>6-SWB-<br>question<br>index |
|------------------------------------------------------------------|-----------------|-----------------------------------------|----------------------------------------------------|-----------------|----------------------------------------|-----------------------------------|------------------------------------|
| Residency prestige<br>and status                                 | 1.3***<br>(0.3) | -0.1<br>(0.3)                           | 0.7**<br>(0.3)                                     | 0.3<br>(0.2)    | 0.2<br>(0.4)                           | 0.5**<br>(0.2)                    | 0.5*<br>(0.3)                      |
| Social life during<br>residency                                  | 0.9***<br>(0.2) | 2.2***<br>(0.3)                         | 1.4***<br>(0.3)                                    | 1.7***<br>(0.2) | 1.6***<br>(0.4)                        | 1.8***<br>(0.2)                   | 1.6***<br>(0.3)                    |
| Desirability of<br>location                                      | 1.0***<br>(0.2) | 0.4*<br>(0.2)                           | 1.2***<br>(0.2)                                    | 1.1***<br>(0.2) | 0.9***<br>(0.3)                        | 1.1***<br>(0.2)                   | 0.9***<br>(0.2)                    |
| Anxiety during<br>residency                                      | -0.4<br>(0.2)   | -0.5*<br>(0.3)                          | -0.3<br>(0.3)                                      | -0.3<br>(0.2)   | -1.0***<br>(0.4)                       | -0.3<br>(0.2)                     | -0.5**<br>(0.3)                    |
| Worthwhile life<br>during residency                              | 2.3***<br>(0.4) | 4.3***<br>(0.5)                         | 4.2***<br>(0.4)                                    | 3.4***<br>(0.3) | 4.4***<br>(0.6)                        | 3.3***<br>(0.3)                   | 3.2***<br>(0.4)                    |
| Stress during<br>residency                                       | -0.0<br>(0.2)   | -0.6**<br>(0.3)                         | -0.4<br>(0.3)                                      | -0.3<br>(0.2)   | 0.3<br>(0.4)                           | -0.3*<br>(0.2)                    | -0.1<br>(0.3)                      |
| Future career<br>prospects                                       | 1.7***<br>(0.4) | 0.4<br>(0.4)                            | 0.3<br>(0.4)                                       | 1.4***<br>(0.3) | 0.5<br>(0.5)                           | 1.0***<br>(0.3)                   | 1.2***<br>(0.4)                    |
| Control over life                                                | 0.1<br>(0.2)    | 0.2<br>(0.3)                            | 0.2<br>(0.3)                                       | 0.0<br>(0.2)    | 0.0<br>(0.4)                           | 0.1<br>(0.2)                      | 0.7**<br>(0.3)                     |
| Desirable for<br>significant other                               | 1.4***<br>(0.2) | 0.1<br>(0.2)                            | 0.3<br>(0.2)                                       | 0.5***<br>(0.2) | -0.1<br>(0.3)                          | 0.5***<br>(0.2)                   | 0.3<br>(0.2)                       |
| # Observations                                                   | 1228            | 1228                                    | 1228                                               | 1227            | 890                                    | 1227                              | 889                                |
| # Students                                                       | 314             | 314                                     | 314                                                | 314             | 300                                    | 314                               | 300                                |
| Joint significance of<br>differences with<br>choice coefficients |                 | 0.000                                   | 0.000                                              | 0.000           | 0.000                                  | 0.000                             | 0.000                              |

**Notes:** This table replicates table 3 with the sample restriction indicated in the table title. \*  $p < .1$ , \*\*  $p < .05$ , \*\*\*  $p < .01$

Table 3 restricted to above-median survey completion time

|                                                                  | (1)<br>Choice   | (2)<br>Happiness<br>during<br>residency | (3)<br>Life<br>satisfaction<br>during<br>residency | (4)<br>Ladder   | (5)<br>4-period-<br>happiness<br>index | (6)<br>3-SWB-<br>measure<br>index | (7)<br>6-SWB-<br>question<br>index |
|------------------------------------------------------------------|-----------------|-----------------------------------------|----------------------------------------------------|-----------------|----------------------------------------|-----------------------------------|------------------------------------|
| Residency prestige<br>and status                                 | 1.1***<br>(0.2) | -0.2<br>(0.3)                           | 0.5**<br>(0.2)                                     | 0.5**<br>(0.2)  | -0.1<br>(0.3)                          | 0.4**<br>(0.2)                    | 0.5*<br>(0.2)                      |
| Social life during<br>residency                                  | 0.7***<br>(0.2) | 1.9***<br>(0.3)                         | 1.4***<br>(0.2)                                    | 1.6***<br>(0.2) | 1.4***<br>(0.3)                        | 1.7***<br>(0.2)                   | 1.4***<br>(0.2)                    |
| Desirability of<br>location                                      | 0.6***<br>(0.1) | 0.3<br>(0.2)                            | 0.7***<br>(0.2)                                    | 0.9***<br>(0.2) | 0.2<br>(0.2)                           | 0.8***<br>(0.1)                   | 0.6***<br>(0.2)                    |
| Anxiety during<br>residency                                      | 0.0<br>(0.2)    | -0.9***<br>(0.3)                        | -0.1<br>(0.2)                                      | -0.5**<br>(0.2) | -1.1***<br>(0.3)                       | -0.4**<br>(0.2)                   | -0.5**<br>(0.2)                    |
| Worthwhile life<br>during residency                              | 2.5***<br>(0.3) | 3.5***<br>(0.5)                         | 4.5***<br>(0.4)                                    | 3.0***<br>(0.3) | 3.2***<br>(0.5)                        | 3.3***<br>(0.3)                   | 3.4***<br>(0.4)                    |
| Stress during<br>residency                                       | 0.2<br>(0.2)    | -0.5*<br>(0.3)                          | -0.3<br>(0.2)                                      | -0.5*<br>(0.2)  | 0.4<br>(0.3)                           | -0.3<br>(0.2)                     | -0.1<br>(0.3)                      |
| Future career<br>prospects                                       | 2.2***<br>(0.3) | 0.9**<br>(0.4)                          | 1.0***<br>(0.4)                                    | 1.4***<br>(0.3) | 1.5***<br>(0.4)                        | 1.4***<br>(0.3)                   | 1.5***<br>(0.4)                    |
| Control over life                                                | 0.3<br>(0.2)    | 0.6**<br>(0.3)                          | 0.1<br>(0.2)                                       | 0.2<br>(0.2)    | 0.9***<br>(0.3)                        | 0.1<br>(0.2)                      | 0.7***<br>(0.2)                    |
| Desirable for<br>significant other                               | 1.5***<br>(0.2) | 0.1<br>(0.2)                            | 0.5***<br>(0.2)                                    | 0.4**<br>(0.2)  | 0.2<br>(0.2)                           | 0.5***<br>(0.1)                   | 0.3*<br>(0.2)                      |
| # Observations                                                   | 1123            | 1121                                    | 1123                                               | 1123            | 827                                    | 1121                              | 827                                |
| # Students                                                       | 284             | 284                                     | 284                                                | 284             | 281                                    | 284                               | 281                                |
| Joint significance of<br>differences with<br>choice coefficients |                 | 0.000                                   | 0.000                                              | 0.000           | 0.000                                  | 0.000                             | 0.000                              |

**Notes:** This table replicates table 3 with the sample restriction indicated in the table title. \*  $p < .1$ , \*\*  $p < .05$ , \*\*\*  $p < .01$

Table 3 restricted to below-median survey completion time

|                                                                  | (1)<br>Choice   | (2)<br>Happiness<br>during<br>residency | (3)<br>Life<br>satisfaction<br>during<br>residency | (4)<br>Ladder   | (5)<br>4-period-<br>happiness<br>index | (6)<br>3-SWB-<br>measure<br>index | (7)<br>6-SWB-<br>question<br>index |
|------------------------------------------------------------------|-----------------|-----------------------------------------|----------------------------------------------------|-----------------|----------------------------------------|-----------------------------------|------------------------------------|
| Residency prestige<br>and status                                 | 1.6***<br>(0.3) | 0.2<br>(0.3)                            | 0.3<br>(0.3)                                       | 0.3<br>(0.3)    | 0.4<br>(0.4)                           | 0.3<br>(0.2)                      | 0.5<br>(0.3)                       |
| Social life during<br>residency                                  | 1.0***<br>(0.3) | 2.0***<br>(0.3)                         | 1.7***<br>(0.3)                                    | 1.5***<br>(0.3) | 1.9***<br>(0.5)                        | 1.8***<br>(0.3)                   | 1.9***<br>(0.3)                    |
| Desirability of<br>location                                      | 1.4***<br>(0.2) | 0.3<br>(0.2)                            | 1.4***<br>(0.3)                                    | 1.0***<br>(0.2) | 0.6*<br>(0.3)                          | 1.1***<br>(0.2)                   | 0.9***<br>(0.3)                    |
| Anxiety during<br>residency                                      | -0.4<br>(0.2)   | -0.6**<br>(0.3)                         | -0.5<br>(0.3)                                      | -0.3<br>(0.2)   | -1.1***<br>(0.4)                       | -0.4*<br>(0.2)                    | -0.7***<br>(0.3)                   |
| Worthwhile life<br>during residency                              | 2.0***<br>(0.4) | 4.0***<br>(0.5)                         | 3.0***<br>(0.5)                                    | 3.3***<br>(0.4) | 4.1***<br>(0.7)                        | 3.0***<br>(0.4)                   | 2.7***<br>(0.5)                    |
| Stress during<br>residency                                       | -0.3<br>(0.2)   | -0.7**<br>(0.3)                         | -0.5*<br>(0.3)                                     | -0.2<br>(0.2)   | 0.2<br>(0.4)                           | -0.4*<br>(0.2)                    | 0.0<br>(0.3)                       |
| Future career<br>prospects                                       | 1.1***<br>(0.4) | 0.2<br>(0.4)                            | 1.0**<br>(0.4)                                     | 1.5***<br>(0.4) | 0.1<br>(0.6)                           | 1.1***<br>(0.3)                   | 1.0**<br>(0.4)                     |
| Control over life                                                | 0.1<br>(0.2)    | 0.4<br>(0.3)                            | 0.5<br>(0.3)                                       | 0.3<br>(0.2)    | 0.2<br>(0.4)                           | 0.3<br>(0.2)                      | 0.7**<br>(0.3)                     |
| Desirable for<br>significant other                               | 1.1***<br>(0.2) | 0.6**<br>(0.2)                          | 0.2<br>(0.2)                                       | 0.7***<br>(0.2) | 0.3<br>(0.3)                           | 0.7***<br>(0.2)                   | 0.6**<br>(0.2)                     |
| # Observations                                                   | 1046            | 1046                                    | 1046                                               | 1045            | 764                                    | 1045                              | 763                                |
| # Students                                                       | 273             | 273                                     | 273                                                | 273             | 259                                    | 273                               | 259                                |
| Joint significance of<br>differences with<br>choice coefficients |                 | 0.000                                   | 0.000                                              | 0.001           | 0.000                                  | 0.000                             | 0.004                              |

**Notes:** This table replicates table 3 with the sample restriction indicated in the table title. \*  $p < .1$ , \*\*  $p < .05$ , \*\*\*  $p < .01$

Table 3 restricted to respondents who refused to be re-contacted

|                                                                  | (1)<br>Choice   | (2)<br>Happiness<br>during<br>residency | (3)<br>Life<br>satisfaction<br>during<br>residency | (4)<br>Ladder   | (5)<br>4-period-<br>happiness<br>index | (6)<br>3-SWB-<br>measure<br>index | (7)<br>6-SWB-<br>question<br>index |
|------------------------------------------------------------------|-----------------|-----------------------------------------|----------------------------------------------------|-----------------|----------------------------------------|-----------------------------------|------------------------------------|
| Residency prestige<br>and status                                 | 2.0***<br>(0.5) | 0.1<br>(0.5)                            | 1.2**<br>(0.6)                                     | 0.8*<br>(0.5)   | -0.3<br>(0.5)                          | 1.2***<br>(0.4)                   | 1.1**<br>(0.5)                     |
| Social life during<br>residency                                  | 0.3<br>(0.3)    | 1.2**<br>(0.5)                          | 0.4<br>(0.5)                                       | 0.6<br>(0.4)    | 1.6***<br>(0.6)                        | 0.7<br>(0.4)                      | 0.8*<br>(0.5)                      |
| Desirability of<br>location                                      | 0.7**<br>(0.3)  | 0.9**<br>(0.4)                          | 1.4***<br>(0.4)                                    | 1.3***<br>(0.3) | 0.3<br>(0.4)                           | 1.4***<br>(0.4)                   | 1.0**<br>(0.4)                     |
| Anxiety during<br>residency                                      | -0.3<br>(0.3)   | -1.4***<br>(0.5)                        | 0.2<br>(0.5)                                       | -0.7*<br>(0.4)  | -1.3**<br>(0.6)                        | -0.8**<br>(0.4)                   | -1.7***<br>(0.4)                   |
| Worthwhile life<br>during residency                              | 2.4***<br>(0.6) | 3.2***<br>(0.7)                         | 3.4***<br>(0.8)                                    | 4.0***<br>(0.7) | 3.0***<br>(0.9)                        | 2.8***<br>(0.6)                   | 2.8***<br>(0.7)                    |
| Stress during<br>residency                                       | 0.1<br>(0.4)    | -1.1**<br>(0.5)                         | -0.9*<br>(0.5)                                     | -0.5<br>(0.4)   | -0.2<br>(0.5)                          | -0.6<br>(0.4)                     | 0.2<br>(0.5)                       |
| Future career<br>prospects                                       | 0.9<br>(0.6)    | -0.0<br>(0.8)                           | 0.1<br>(0.8)                                       | 0.3<br>(0.7)    | 1.3*<br>(0.7)                          | -0.1<br>(0.7)                     | 0.2<br>(0.8)                       |
| Control over life                                                | 0.4<br>(0.3)    | 0.6<br>(0.4)                            | -0.3<br>(0.4)                                      | 0.1<br>(0.4)    | 0.4<br>(0.5)                           | 0.2<br>(0.4)                      | 0.6<br>(0.5)                       |
| Desirable for<br>significant other                               | 2.0***<br>(0.4) | 0.4<br>(0.4)                            | 1.0**<br>(0.5)                                     | 0.7*<br>(0.4)   | 0.6<br>(0.5)                           | 1.2***<br>(0.4)                   | 0.7<br>(0.4)                       |
| # Observations                                                   | 496             | 495                                     | 496                                                | 496             | 352                                    | 495                               | 352                                |
| # Students                                                       | 130             | 130                                     | 130                                                | 130             | 121                                    | 130                               | 121                                |
| Joint significance of<br>differences with<br>choice coefficients |                 | 0.000                                   | 0.006                                              | 0.001           | 0.000                                  | 0.004                             | 0.012                              |

**Notes:** This table replicates table 3 with the sample restriction indicated in the table title. \*  $p < .1$ , \*\*  $p < .05$ , \*\*\*  $p < .01$

Table 3 restricted to respondents who agreed to be re-contacted

|                                                                  | (1)<br>Choice   | (2)<br>Happiness<br>during<br>residency | (3)<br>Life<br>satisfaction<br>during<br>residency | (4)<br>Ladder   | (5)<br>4-period-<br>happiness<br>index | (6)<br>3-SWB-<br>measure<br>index | (7)<br>6-SWB-<br>question<br>index |
|------------------------------------------------------------------|-----------------|-----------------------------------------|----------------------------------------------------|-----------------|----------------------------------------|-----------------------------------|------------------------------------|
| Residency prestige<br>and status                                 | 1.1***<br>(0.2) | -0.0<br>(0.2)                           | 0.2<br>(0.2)                                       | 0.3*<br>(0.2)   | 0.2<br>(0.3)                           | 0.2<br>(0.2)                      | 0.3<br>(0.2)                       |
| Social life during<br>residency                                  | 1.0***<br>(0.2) | 2.3***<br>(0.3)                         | 1.8***<br>(0.2)                                    | 1.9***<br>(0.2) | 1.6***<br>(0.3)                        | 2.0***<br>(0.2)                   | 1.8***<br>(0.2)                    |
| Desirability of<br>location                                      | 1.0***<br>(0.1) | 0.2<br>(0.2)                            | 0.9***<br>(0.1)                                    | 0.8***<br>(0.1) | 0.4*<br>(0.2)                          | 0.8***<br>(0.1)                   | 0.7***<br>(0.2)                    |
| Anxiety during<br>residency                                      | -0.0<br>(0.2)   | -0.5**<br>(0.2)                         | -0.3<br>(0.2)                                      | -0.3<br>(0.2)   | -1.0***<br>(0.3)                       | -0.3<br>(0.2)                     | -0.3<br>(0.2)                      |
| Worthwhile life<br>during residency                              | 2.4***<br>(0.3) | 4.1***<br>(0.4)                         | 3.8***<br>(0.3)                                    | 2.9***<br>(0.3) | 3.8***<br>(0.5)                        | 3.2***<br>(0.3)                   | 3.3***<br>(0.3)                    |
| Stress during<br>residency                                       | -0.1<br>(0.2)   | -0.5**<br>(0.2)                         | -0.3<br>(0.2)                                      | -0.2<br>(0.2)   | 0.5*<br>(0.3)                          | -0.3*<br>(0.2)                    | 0.0<br>(0.2)                       |
| Future career<br>prospects                                       | 2.0***<br>(0.3) | 0.7**<br>(0.3)                          | 1.2***<br>(0.3)                                    | 1.8***<br>(0.3) | 0.7<br>(0.4)                           | 1.6***<br>(0.2)                   | 1.5***<br>(0.3)                    |
| Control over life                                                | 0.2<br>(0.2)    | 0.5**<br>(0.2)                          | 0.4**<br>(0.2)                                     | 0.2<br>(0.2)    | 0.7**<br>(0.3)                         | 0.2<br>(0.2)                      | 0.7***<br>(0.2)                    |
| Desirable for<br>significant other                               | 1.2***<br>(0.1) | 0.2<br>(0.2)                            | 0.2<br>(0.1)                                       | 0.4***<br>(0.1) | 0.1<br>(0.2)                           | 0.4***<br>(0.1)                   | 0.3**<br>(0.1)                     |
| # Observations                                                   | 1648            | 1647                                    | 1648                                               | 1647            | 1221                                   | 1646                              | 1220                               |
| # Students                                                       | 419             | 419                                     | 419                                                | 419             | 412                                    | 419                               | 412                                |
| Joint significance of<br>differences with<br>choice coefficients |                 | 0.000                                   | 0.000                                              | 0.000           | 0.000                                  | 0.000                             | 0.000                              |

Notes: This table replicates table 3 with the sample restriction indicated in the table title. \*  $p < .1$ , \*\*  $p < .05$ , \*\*\*  $p < .01$

Table 3 restricted to respondents who participated in follow-up survey

|                                                                  | (1)<br>Choice   | (2)<br>Happiness<br>during<br>residency | (3)<br>Life<br>satisfaction<br>during<br>residency | (4)<br>Ladder   | (5)<br>4-period-<br>happiness<br>index | (6)<br>3-SWB-<br>measure<br>index | (7)<br>6-SWB-<br>question<br>index |
|------------------------------------------------------------------|-----------------|-----------------------------------------|----------------------------------------------------|-----------------|----------------------------------------|-----------------------------------|------------------------------------|
| Residency prestige<br>and status                                 | 1.0***<br>(0.3) | -0.1<br>(0.3)                           | 0.4<br>(0.3)                                       | 0.3<br>(0.3)    | 0.3<br>(0.4)                           | 0.4<br>(0.3)                      | 0.6*<br>(0.3)                      |
| Social life during<br>residency                                  | 1.2***<br>(0.3) | 1.3***<br>(0.4)                         | 1.0***<br>(0.3)                                    | 2.0***<br>(0.4) | 1.1***<br>(0.4)                        | 1.5***<br>(0.3)                   | 2.0***<br>(0.4)                    |
| Desirability of<br>location                                      | 0.9***<br>(0.2) | 0.4<br>(0.3)                            | 1.0***<br>(0.2)                                    | 1.0***<br>(0.3) | 0.4<br>(0.3)                           | 1.1***<br>(0.2)                   | 0.7**<br>(0.3)                     |
| Anxiety during<br>residency                                      | 0.2<br>(0.3)    | -1.0**<br>(0.4)                         | -0.4<br>(0.4)                                      | -0.5<br>(0.4)   | -1.6***<br>(0.4)                       | -0.6*<br>(0.4)                    | -0.8**<br>(0.4)                    |
| Worthwhile life<br>during residency                              | 1.5***<br>(0.4) | 3.6***<br>(0.6)                         | 3.8***<br>(0.5)                                    | 2.2***<br>(0.5) | 3.8***<br>(0.7)                        | 2.5***<br>(0.4)                   | 2.9***<br>(0.6)                    |
| Stress during<br>residency                                       | -0.4<br>(0.3)   | -0.5<br>(0.4)                           | -0.5<br>(0.4)                                      | -0.2<br>(0.4)   | 0.4<br>(0.4)                           | -0.3<br>(0.3)                     | 0.1<br>(0.4)                       |
| Future career<br>prospects                                       | 2.1***<br>(0.4) | 0.6<br>(0.5)                            | 1.1***<br>(0.4)                                    | 1.6***<br>(0.5) | 0.2<br>(0.5)                           | 1.4***<br>(0.4)                   | 0.9*<br>(0.5)                      |
| Control over life                                                | 0.4<br>(0.3)    | 1.3***<br>(0.4)                         | 0.6<br>(0.3)                                       | 0.6<br>(0.4)    | 1.2***<br>(0.4)                        | 0.8**<br>(0.3)                    | 0.8**<br>(0.4)                     |
| Desirable for<br>significant other                               | 1.3***<br>(0.3) | 0.2<br>(0.3)                            | 0.3<br>(0.2)                                       | 0.6**<br>(0.3)  | 0.0<br>(0.3)                           | 0.5**<br>(0.2)                    | 0.2<br>(0.3)                       |
| # Observations                                                   | 509             | 509                                     | 509                                                | 508             | 380                                    | 508                               | 379                                |
| # Students                                                       | 130             | 130                                     | 130                                                | 130             | 128                                    | 130                               | 128                                |
| Joint significance of<br>differences with<br>choice coefficients |                 | 0.000                                   | 0.000                                              | 0.004           | 0.000                                  | 0.000                             | 0.000                              |

**Notes:** This table replicates table 3 with the sample restriction indicated in the table title. \*  $p < .1$ , \*\*  $p < .05$ , \*\*\*  $p < .01$



Table 3 restricted to respondents who did not participate in follow-up survey

|                                                                  | (1)<br>Choice   | (2)<br>Happiness<br>during<br>residency | (3)<br>Life<br>satisfaction<br>during<br>residency | (4)<br>Ladder   | (5)<br>4-period-<br>happiness<br>index | (6)<br>3-SWB-<br>measure<br>index | (7)<br>6-SWB-<br>question<br>index |
|------------------------------------------------------------------|-----------------|-----------------------------------------|----------------------------------------------------|-----------------|----------------------------------------|-----------------------------------|------------------------------------|
| Residency prestige<br>and status                                 | 1.5***<br>(0.2) | 0.1<br>(0.3)                            | 0.4*<br>(0.2)                                      | 0.5***<br>(0.2) | 0.2<br>(0.3)                           | 0.4**<br>(0.2)                    | 0.4*<br>(0.2)                      |
| Social life during<br>residency                                  | 0.7***<br>(0.2) | 2.2***<br>(0.3)                         | 1.7***<br>(0.2)                                    | 1.5***<br>(0.2) | 1.8***<br>(0.3)                        | 1.8***<br>(0.2)                   | 1.5***<br>(0.2)                    |
| Desirability of<br>location                                      | 0.9***<br>(0.2) | 0.3<br>(0.2)                            | 1.0***<br>(0.2)                                    | 0.9***<br>(0.2) | 0.4*<br>(0.2)                          | 0.9***<br>(0.1)                   | 0.8***<br>(0.2)                    |
| Anxiety during<br>residency                                      | -0.2<br>(0.2)   | -0.7***<br>(0.2)                        | -0.2<br>(0.2)                                      | -0.4**<br>(0.2) | -1.0***<br>(0.3)                       | -0.4**<br>(0.2)                   | -0.6***<br>(0.2)                   |
| Worthwhile life<br>during residency                              | 2.7***<br>(0.3) | 4.0***<br>(0.4)                         | 3.9***<br>(0.4)                                    | 3.5***<br>(0.3) | 3.7***<br>(0.5)                        | 3.4***<br>(0.3)                   | 3.2***<br>(0.4)                    |
| Stress during<br>residency                                       | -0.0<br>(0.2)   | -0.6**<br>(0.2)                         | -0.4<br>(0.2)                                      | -0.3*<br>(0.2)  | 0.3<br>(0.3)                           | -0.3*<br>(0.2)                    | 0.0<br>(0.2)                       |
| Future career<br>prospects                                       | 1.5***<br>(0.3) | 0.5<br>(0.4)                            | 0.9**<br>(0.4)                                     | 1.4***<br>(0.3) | 1.0**<br>(0.5)                         | 1.2***<br>(0.3)                   | 1.4***<br>(0.4)                    |
| Control over life                                                | 0.2<br>(0.2)    | 0.4<br>(0.2)                            | 0.2<br>(0.2)                                       | 0.1<br>(0.2)    | 0.3<br>(0.3)                           | 0.1<br>(0.2)                      | 0.6***<br>(0.2)                    |
| Desirable for<br>significant other                               | 1.4***<br>(0.2) | 0.3*<br>(0.2)                           | 0.3**<br>(0.2)                                     | 0.5***<br>(0.1) | 0.3<br>(0.2)                           | 0.6***<br>(0.1)                   | 0.5***<br>(0.2)                    |
| # Observations                                                   | 1660            | 1658                                    | 1660                                               | 1660            | 1211                                   | 1658                              | 1211                               |
| # Students                                                       | 427             | 427                                     | 427                                                | 427             | 412                                    | 427                               | 412                                |
| Joint significance of<br>differences with<br>choice coefficients |                 | 0.000                                   | 0.000                                              | 0.000           | 0.000                                  | 0.000                             | 0.000                              |

Notes: This table replicates table 3 with the sample restriction indicated in the table title. \*  $p < .1$ , \*\*  $p < .05$ , \*\*\*  $p < .01$

Table 3 restricted to respondents who did not participate in the dual match

|                                                                  | (1)<br>Choice   | (2)<br>Happiness<br>during<br>residency | (3)<br>Life<br>satisfaction<br>during<br>residency | (4)<br>Ladder   | (5)<br>4-period-<br>happiness<br>index | (6)<br>3-SWB-<br>measure<br>index | (7)<br>6-SWB-<br>question<br>index |
|------------------------------------------------------------------|-----------------|-----------------------------------------|----------------------------------------------------|-----------------|----------------------------------------|-----------------------------------|------------------------------------|
| Residency prestige<br>and status                                 | 1.3***<br>(0.2) | 0.0<br>(0.2)                            | 0.4*<br>(0.2)                                      | 0.4**<br>(0.2)  | 0.1<br>(0.3)                           | 0.4***<br>(0.2)                   | 0.5**<br>(0.2)                     |
| Social life during<br>residency                                  | 0.8***<br>(0.2) | 1.9***<br>(0.2)                         | 1.5***<br>(0.2)                                    | 1.6***<br>(0.2) | 1.6***<br>(0.3)                        | 1.7***<br>(0.2)                   | 1.6***<br>(0.2)                    |
| Desirability of<br>location                                      | 0.9***<br>(0.1) | 0.3*<br>(0.2)                           | 0.9***<br>(0.1)                                    | 0.9***<br>(0.1) | 0.4**<br>(0.2)                         | 0.9***<br>(0.1)                   | 0.8***<br>(0.1)                    |
| Anxiety during<br>residency                                      | -0.1<br>(0.2)   | -0.8***<br>(0.2)                        | -0.2<br>(0.2)                                      | -0.4**<br>(0.2) | -1.1***<br>(0.2)                       | -0.4**<br>(0.2)                   | -0.6***<br>(0.2)                   |
| Worthwhile life<br>during residency                              | 2.4***<br>(0.3) | 4.0***<br>(0.3)                         | 4.0***<br>(0.3)                                    | 3.3***<br>(0.3) | 3.8***<br>(0.4)                        | 3.3***<br>(0.2)                   | 3.2***<br>(0.3)                    |
| Stress during<br>residency                                       | -0.1<br>(0.2)   | -0.6***<br>(0.2)                        | -0.5**<br>(0.2)                                    | -0.3*<br>(0.2)  | 0.3<br>(0.3)                           | -0.4**<br>(0.2)                   | -0.0<br>(0.2)                      |
| Future career<br>prospects                                       | 1.8***<br>(0.3) | 0.5*<br>(0.3)                           | 1.0***<br>(0.3)                                    | 1.4***<br>(0.3) | 0.9**<br>(0.4)                         | 1.1***<br>(0.2)                   | 1.2***<br>(0.3)                    |
| Control over life                                                | 0.2<br>(0.2)    | 0.5***<br>(0.2)                         | 0.2<br>(0.2)                                       | 0.2<br>(0.2)    | 0.6**<br>(0.3)                         | 0.2<br>(0.1)                      | 0.7***<br>(0.2)                    |
| Desirable for<br>significant other                               | 1.4***<br>(0.1) | 0.3**<br>(0.2)                          | 0.4**<br>(0.1)                                     | 0.5***<br>(0.1) | 0.2<br>(0.2)                           | 0.6***<br>(0.1)                   | 0.4***<br>(0.2)                    |
| # Observations                                                   | 2028            | 2026                                    | 2028                                               | 2027            | 1492                                   | 2025                              | 1491                               |
| # Students                                                       | 520             | 520                                     | 520                                                | 520             | 506                                    | 520                               | 506                                |
| Joint significance of<br>differences with<br>choice coefficients |                 | 0.000                                   | 0.000                                              | 0.000           | 0.000                                  | 0.000                             | 0.000                              |

**Notes:** This table replicates table 3 with the sample restriction indicated in the table title. \*  $p < .1$ , \*\*  $p < .05$ , \*\*\*  $p < .01$

Table 3 restricted to respondents who did not report manipulation attempts by the school

|                                                                  | (1)<br>Choice   | (2)<br>Happiness<br>during<br>residency | (3)<br>Life<br>satisfaction<br>during<br>residency | (4)<br>Ladder    | (5)<br>4-period-<br>happiness<br>index | (6)<br>3-SWB-<br>measure<br>index | (7)<br>6-SWB-<br>question<br>index |
|------------------------------------------------------------------|-----------------|-----------------------------------------|----------------------------------------------------|------------------|----------------------------------------|-----------------------------------|------------------------------------|
| Residency prestige<br>and status                                 | 1.3***<br>(0.2) | 0.0<br>(0.2)                            | 0.4*<br>(0.2)                                      | 0.5***<br>(0.2)  | 0.2<br>(0.3)                           | 0.4***<br>(0.2)                   | 0.6***<br>(0.2)                    |
| Social life during<br>residency                                  | 0.8***<br>(0.2) | 2.1***<br>(0.2)                         | 1.5***<br>(0.2)                                    | 1.6***<br>(0.2)  | 1.6***<br>(0.3)                        | 1.8***<br>(0.2)                   | 1.6***<br>(0.2)                    |
| Desirability of<br>location                                      | 0.9***<br>(0.1) | 0.3*<br>(0.2)                           | 1.0***<br>(0.1)                                    | 0.9***<br>(0.1)  | 0.4*<br>(0.2)                          | 0.9***<br>(0.1)                   | 0.8***<br>(0.1)                    |
| Anxiety during<br>residency                                      | -0.2<br>(0.2)   | -0.8***<br>(0.2)                        | -0.2<br>(0.2)                                      | -0.4***<br>(0.2) | -1.1***<br>(0.2)                       | -0.4***<br>(0.2)                  | -0.6***<br>(0.2)                   |
| Worthwhile life<br>during residency                              | 2.3***<br>(0.3) | 3.9***<br>(0.3)                         | 3.9***<br>(0.3)                                    | 3.2***<br>(0.3)  | 3.7***<br>(0.4)                        | 3.2***<br>(0.2)                   | 3.2***<br>(0.3)                    |
| Stress during<br>residency                                       | -0.1<br>(0.2)   | -0.6***<br>(0.2)                        | -0.5**<br>(0.2)                                    | -0.3<br>(0.2)    | 0.4<br>(0.3)                           | -0.4**<br>(0.2)                   | -0.0<br>(0.2)                      |
| Future career<br>prospects                                       | 1.7***<br>(0.3) | 0.5<br>(0.3)                            | 1.0***<br>(0.3)                                    | 1.4***<br>(0.3)  | 0.8**<br>(0.4)                         | 1.2***<br>(0.2)                   | 1.2***<br>(0.3)                    |
| Control over life                                                | 0.2<br>(0.2)    | 0.6***<br>(0.2)                         | 0.2<br>(0.2)                                       | 0.2<br>(0.2)     | 0.6**<br>(0.3)                         | 0.2<br>(0.1)                      | 0.7***<br>(0.2)                    |
| Desirable for<br>significant other                               | 1.4***<br>(0.1) | 0.3*<br>(0.2)                           | 0.4***<br>(0.1)                                    | 0.5***<br>(0.1)  | 0.2<br>(0.2)                           | 0.5***<br>(0.1)                   | 0.4***<br>(0.1)                    |
| # Observations                                                   | 2098            | 2096                                    | 2098                                               | 2097             | 1540                                   | 2095                              | 1539                               |
| # Students                                                       | 538             | 538                                     | 538                                                | 538              | 523                                    | 538                               | 523                                |
| Joint significance of<br>differences with<br>choice coefficients |                 | 0.000                                   | 0.000                                              | 0.000            | 0.000                                  | 0.000                             | 0.000                              |

Notes: This table replicates table 3 with the sample restriction indicated in the table title. \*  $p < .1$ , \*\*  $p < .05$ , \*\*\*  $p < .01$

Table 3 restricted to respondents who felt their NRMP choice order represented their true preferences

|                                                                  | (1)<br>Choice   | (2)<br>Happiness<br>during<br>residency | (3)<br>Life<br>satisfaction<br>during<br>residency | (4)<br>Ladder   | (5)<br>4-period-<br>happiness<br>index | (6)<br>3-SWB-<br>measure<br>index | (7)<br>6-SWB-<br>question<br>index |
|------------------------------------------------------------------|-----------------|-----------------------------------------|----------------------------------------------------|-----------------|----------------------------------------|-----------------------------------|------------------------------------|
| Residency prestige<br>and status                                 | 1.3***<br>(0.2) | 0.1<br>(0.2)                            | 0.6***<br>(0.2)                                    | 0.4**<br>(0.2)  | 0.3<br>(0.3)                           | 0.4***<br>(0.2)                   | 0.5**<br>(0.2)                     |
| Social life during<br>residency                                  | 0.9***<br>(0.2) | 2.1***<br>(0.2)                         | 1.8***<br>(0.2)                                    | 1.7***<br>(0.2) | 1.8***<br>(0.3)                        | 1.9***<br>(0.2)                   | 1.8***<br>(0.2)                    |
| Desirability of<br>location                                      | 0.9***<br>(0.1) | 0.3*<br>(0.2)                           | 0.9***<br>(0.2)                                    | 1.0***<br>(0.2) | 0.3<br>(0.2)                           | 0.9***<br>(0.1)                   | 0.7***<br>(0.2)                    |
| Anxiety during<br>residency                                      | -0.1<br>(0.2)   | -0.6***<br>(0.2)                        | -0.2<br>(0.2)                                      | -0.3<br>(0.2)   | -1.0***<br>(0.3)                       | -0.3*<br>(0.2)                    | -0.5***<br>(0.2)                   |
| Worthwhile life<br>during residency                              | 2.5***<br>(0.3) | 4.0***<br>(0.4)                         | 3.6***<br>(0.3)                                    | 3.2***<br>(0.3) | 3.7***<br>(0.5)                        | 3.1***<br>(0.3)                   | 3.2***<br>(0.3)                    |
| Stress during<br>residency                                       | -0.2<br>(0.2)   | -0.7***<br>(0.2)                        | -0.4*<br>(0.2)                                     | -0.3*<br>(0.2)  | 0.4<br>(0.3)                           | -0.4**<br>(0.2)                   | 0.0<br>(0.2)                       |
| Future career<br>prospects                                       | 1.8***<br>(0.3) | 0.3<br>(0.3)                            | 0.8***<br>(0.3)                                    | 1.4***<br>(0.3) | 0.6<br>(0.4)                           | 1.1***<br>(0.2)                   | 1.2***<br>(0.3)                    |
| Control over life                                                | 0.3*<br>(0.2)   | 0.5**<br>(0.2)                          | 0.5**<br>(0.2)                                     | 0.2<br>(0.2)    | 0.6*<br>(0.3)                          | 0.4**<br>(0.2)                    | 0.8***<br>(0.2)                    |
| Desirable for<br>significant other                               | 1.1***<br>(0.1) | 0.4**<br>(0.2)                          | 0.3<br>(0.2)                                       | 0.5***<br>(0.2) | 0.3<br>(0.2)                           | 0.6***<br>(0.1)                   | 0.4**<br>(0.2)                     |
| # Observations                                                   | 1797            | 1797                                    | 1797                                               | 1796            | 1323                                   | 1796                              | 1322                               |
| # Students                                                       | 461             | 461                                     | 461                                                | 461             | 448                                    | 461                               | 448                                |
| Joint significance of<br>differences with<br>choice coefficients |                 | 0.000                                   | 0.000                                              | 0.000           | 0.000                                  | 0.000                             | 0.000                              |

**Notes:** This table replicates table 3 with the sample restriction indicated in the table title. \*  $p < .1$ , \*\*  $p < .05$ , \*\*\*  $p < .01$

Table 3 restricted to respondents who did not feel that their NRMP choice order represented their true preferences, using their reported true preferences

|                                                                  | (1)<br>Reported<br>True<br>Preferences | (2)<br>Happiness<br>during<br>residency | (3)<br>Life<br>satisfaction<br>during<br>residency | (4)<br>Ladder   | (5)<br>4-period-<br>happiness<br>index | (6)<br>3-SWB-<br>measure<br>index | (7)<br>6-SWB-<br>question<br>index |
|------------------------------------------------------------------|----------------------------------------|-----------------------------------------|----------------------------------------------------|-----------------|----------------------------------------|-----------------------------------|------------------------------------|
| Residency prestige<br>and status                                 | 2.5***<br>(0.7)                        | -0.5<br>(0.4)                           | -0.2<br>(0.4)                                      | 0.6<br>(0.4)    | -0.6<br>(0.5)                          | 0.1<br>(0.4)                      | 0.5<br>(0.5)                       |
| Social life during<br>residency                                  | 0.9**<br>(0.4)                         | 1.8***<br>(0.5)                         | 0.2<br>(0.4)                                       | 1.2***<br>(0.4) | 1.1**<br>(0.4)                         | 1.2***<br>(0.4)                   | 1.0**<br>(0.5)                     |
| Desirability of<br>location                                      | 1.1***<br>(0.3)                        | 0.1<br>(0.3)                            | 1.1***<br>(0.3)                                    | 0.8***<br>(0.3) | 0.3<br>(0.3)                           | 1.0***<br>(0.3)                   | 1.0***<br>(0.3)                    |
| Anxiety during<br>residency                                      | -0.7<br>(0.5)                          | -1.3***<br>(0.4)                        | -0.5<br>(0.4)                                      | -0.9**<br>(0.4) | -1.2***<br>(0.4)                       | -1.0**<br>(0.4)                   | -1.0**<br>(0.4)                    |
| Worthwhile life<br>during residency                              | 1.8***<br>(0.7)                        | 3.1***<br>(0.7)                         | 4.4***<br>(0.8)                                    | 2.9***<br>(0.6) | 2.9***<br>(0.8)                        | 3.0***<br>(0.6)                   | 3.0***<br>(0.7)                    |
| Stress during<br>residency                                       | 0.2<br>(0.5)                           | -0.3<br>(0.4)                           | -0.4<br>(0.4)                                      | -0.1<br>(0.4)   | 0.1<br>(0.4)                           | -0.1<br>(0.4)                     | -0.2<br>(0.4)                      |
| Future career<br>prospects                                       | 0.4<br>(0.8)                           | 1.4**<br>(0.6)                          | 1.2**<br>(0.6)                                     | 1.8***<br>(0.6) | 2.0***<br>(0.6)                        | 1.9***<br>(0.6)                   | 1.7**<br>(0.7)                     |
| Control over life                                                | -0.7*<br>(0.4)                         | 0.5<br>(0.4)                            | -0.4<br>(0.3)                                      | 0.2<br>(0.3)    | 0.7*<br>(0.4)                          | -0.2<br>(0.3)                     | 0.2<br>(0.4)                       |
| Desirable for<br>significant other                               | -0.6**<br>(0.3)                        | 0.0<br>(0.3)                            | 0.7***<br>(0.3)                                    | 0.5*<br>(0.3)   | 0.0<br>(0.3)                           | 0.6**<br>(0.2)                    | 0.5<br>(0.3)                       |
| # Observations                                                   | 339                                    | 370                                     | 372                                                | 372             | 268                                    | 370                               | 268                                |
| # Students                                                       | 88                                     | 96                                      | 96                                                 | 96              | 92                                     | 96                                | 92                                 |
| Joint significance of<br>differences with<br>choice coefficients |                                        | 0.000                                   | 0.000                                              | 0.001           | 0.000                                  | 0.000                             | 0.001                              |

**Notes:** This table replicates table 3 with the sample restriction indicated in the table title. \*  $p < .1$ , \*\*  $p < .05$ , \*\*\*  $p < .01$

Appendix Figure A1: Distributions of Variables by Program Rank, Demeaned at Respondent Level

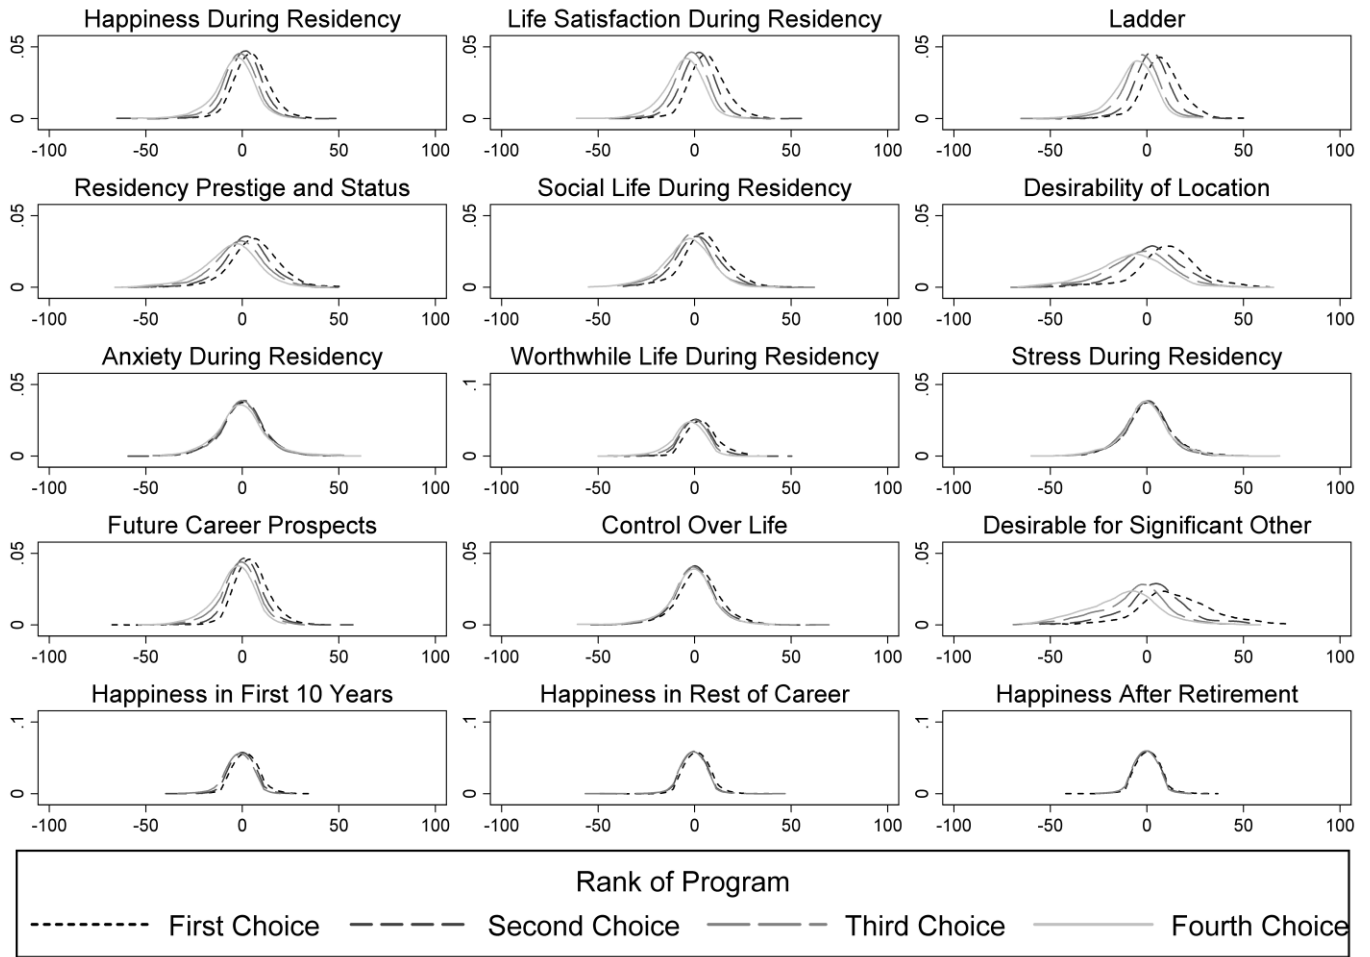

**Notes:** Kernel density plots of residency attributes by preference order. (Epanechnikov; Bandwidth 5.) Based on the 561 respondents in the main sample.
